# Supplementary material
Source: Elsevier journal article supplement (https://lup.lub.lu.se/search/files/55266565/mmc2.pdf)
Supplement: mmc2 [file mmc2.pdf]

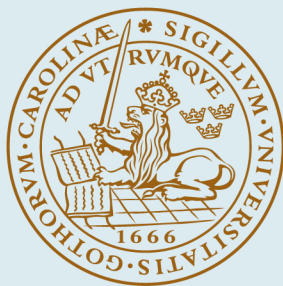

# LUND UNIVERSITY

## Wild African *Drosophila melanogaster* are seasonal specialists on marula fruits

Mansourian, Suzan; Enjin, Anders; Jirle, Erling; Ramesh, Vedika; Rehermann, Guillermo; Becher, Paul G.; Pool, John E.; Stensmyr, Marcus

*Published in:*  
Current Biology

2018

*Document Version:*  
Publisher's PDF, also known as Version of record

[Link to publication](#)

*Citation for published version (APA):*

Mansourian, S., Enjin, A., Jirle, E., Ramesh, V., Rehermann, G., Becher, P. G., Pool, J. E., & Stensmyr, M. (2018). Wild African *Drosophila melanogaster* are seasonal specialists on marula fruits. *Current Biology*, 28(24), 3960-3968.e3.

*Total number of authors:*  
8

*Creative Commons License:*  
CC BY-NC-ND

### General rights

Unless other specific re-use rights are stated the following general rights apply: Copyright and moral rights for the publications made accessible in the public portal are retained by the authors and/or other copyright owners and it is a condition of accessing publications that users recognise and abide by the legal requirements associated with these rights.

- Users may download and print one copy of any publication from the public portal for the purpose of private study or research.
- You may not further distribute the material or use it for any profit-making activity or commercial gain
- You may freely distribute the URL identifying the publication in the public portal

Read more about Creative commons licenses: <https://creativecommons.org/licenses/>

### Take down policy

If you believe that this document breaches copyright please contact us providing details, and we will remove access to the work immediately and investigate your claim.

LUND UNIVERSITY

PO Box 117  
221 00 Lund  
+46 46-222 00 00

# Wild African *Drosophila melanogaster* Are Seasonal Specialists on Marula Fruit

Suzan Mansourian,<sup>1</sup> Anders Enjin,<sup>1</sup> Erling V. Jirle,<sup>1</sup> Vedika Ramesh,<sup>2</sup> Guillermo Rehermann,<sup>3</sup> Paul G. Becher,<sup>3</sup> John E. Pool,<sup>2</sup> and Marcus C. Stensmyr<sup>1,4,\*</sup>

<sup>1</sup>Department of Biology, Lund University, 223 62 Lund, Sweden

<sup>2</sup>Laboratory of Genetics, University of Wisconsin, Madison, WI 53706, USA

<sup>3</sup>Chemical Ecology Group, SLU Alnarp, 230 53 Alnarp, Sweden

<sup>4</sup>Lead Contact

\*Correspondence: [marcus.stensmyr@biol.lu.se](mailto:marcus.stensmyr@biol.lu.se)

<https://doi.org/10.1016/j.cub.2018.10.033>

## SUMMARY

Although the vinegar fly *Drosophila melanogaster* is arguably the most studied organism on the planet, fundamental aspects of this species' natural ecology have remained enigmatic [1]. We have here investigated a wild population of *D. melanogaster* from a mopane forest in Zimbabwe. We find that these flies are closely associated with marula fruit (*Sclerocarya birrea*) and propose that this seasonally abundant and predominantly Southern African fruit is a key ancestral host of *D. melanogaster*. Moreover, when fruiting, marula is nearly exclusively used by *D. melanogaster*, suggesting that these forest-dwelling *D. melanogaster* are seasonal specialists, in a similar manner to, e.g., *Drosophila erecta* on screw pine cones [2]. We further demonstrate that the main chemicals released by marula activate odorant receptors that mediate species-specific host choice (Or22a) [3, 4] and oviposition site selection (Or19a) [5]. The Or22a-expressing neurons—ab3A—respond strongly to the marula ester ethyl isovalerate, a volatile rarely encountered in high amounts in other fruit. We also show that Or22a differs among African populations sampled from a wide range of habitats, in line with a function associated with host fruit usage. Flies from Southern Africa, most of which carry a distinct allele at the *Or22a/Or22b* locus, have ab3A neurons that are more sensitive to ethyl isovalerate than, e.g., European flies. Finally, we discuss the possibility that marula, which is also a culturally and nutritionally important resource to humans, may have helped the transition to commensalism in *D. melanogaster*.

## RESULTS AND DISCUSSION

### Marula—Candidate Ancestral Host of *Drosophila melanogaster*

The vinegar fly *Drosophila melanogaster* displays preference toward certain fruit and strongly favors citrus for egg laying [5]. The

presence of a distinct host partiality is intriguing and implies that *D. melanogaster* during its evolutionary history likely has had a close association with a specific fruit, or group of fruit, with characteristics akin to citrus. This ancestral host is, however, likely not found among members of the Asian genus *Citrus*, but rather among fruit found within the Miombo and Mopane forests of the fly's predicted *Urheimat* in Southern Africa, more precisely in present day Zimbabwe and Zambia [6] (Figure 1A).

The Miombo and Mopane forests carry an impressive diversity of fruit-bearing plants [7] (Figures 1B and 1C). Based on what we know of *D. melanogaster*'s physiology and preference, we can, however, deduce some of this hypothetical ancestral host's characteristics (Figure S1) and thereby narrow down the list of likely candidates. In this context, marula stands out. This fruit is extremely abundant, only matched in terms of biomass by figs (*Ficus* spp.) [7] (Figure 1D), and displays physical and chemical properties that fit with the known preference of *D. melanogaster*. In brief, marula has a thick rind similar to that of citrus, which encloses a sugary (and highly fermentable) juicy pulp (Figure 1E), with a pH similar to that of orange (Figure 1G), features all favored by *D. melanogaster* (Figure S1). Marula emits terpenes and esters, which in terms of total emission contribution, as well as in numbers, are the primary chemical components, as determined via gas chromatography-mass spectrometry analysis of headspace collections (Figures 1H and 1I). The two main chemicals, ethyl isovalerate (an ester) and  $\beta$ -caryophyllene (a sesquiterpene), together make up ~55% of the headspace. Both terpenes and esters are known to be important and ecologically relevant olfactory cues for *D. melanogaster* [5, 8]. In short, marula fulfills the criteria on essentially all counts and is accordingly a good candidate ancestral host.

### Wild *D. melanogaster* in the Ancestral Habitat Utilize Marula

Do flies from native habitats then use marula? To answer this question, we mounted an expedition to Southern Africa in search of forest-dwelling *D. melanogaster* and marula. Specifically, we searched mopane woodlands of the Matopos national park in Southwestern Zimbabwe (Figure 2A), a site situated within the predicted ancestral range [6]. The Matopos covers 424 km<sup>2</sup>, hosts no permanent human habitation, and is covered in Mopane and kopje woodlands (Figure 2B).

Once in the Matopos, we localized marula trees (Figure 2C), as well as fruiting trees with fermenting fruit below (Figure 2D),

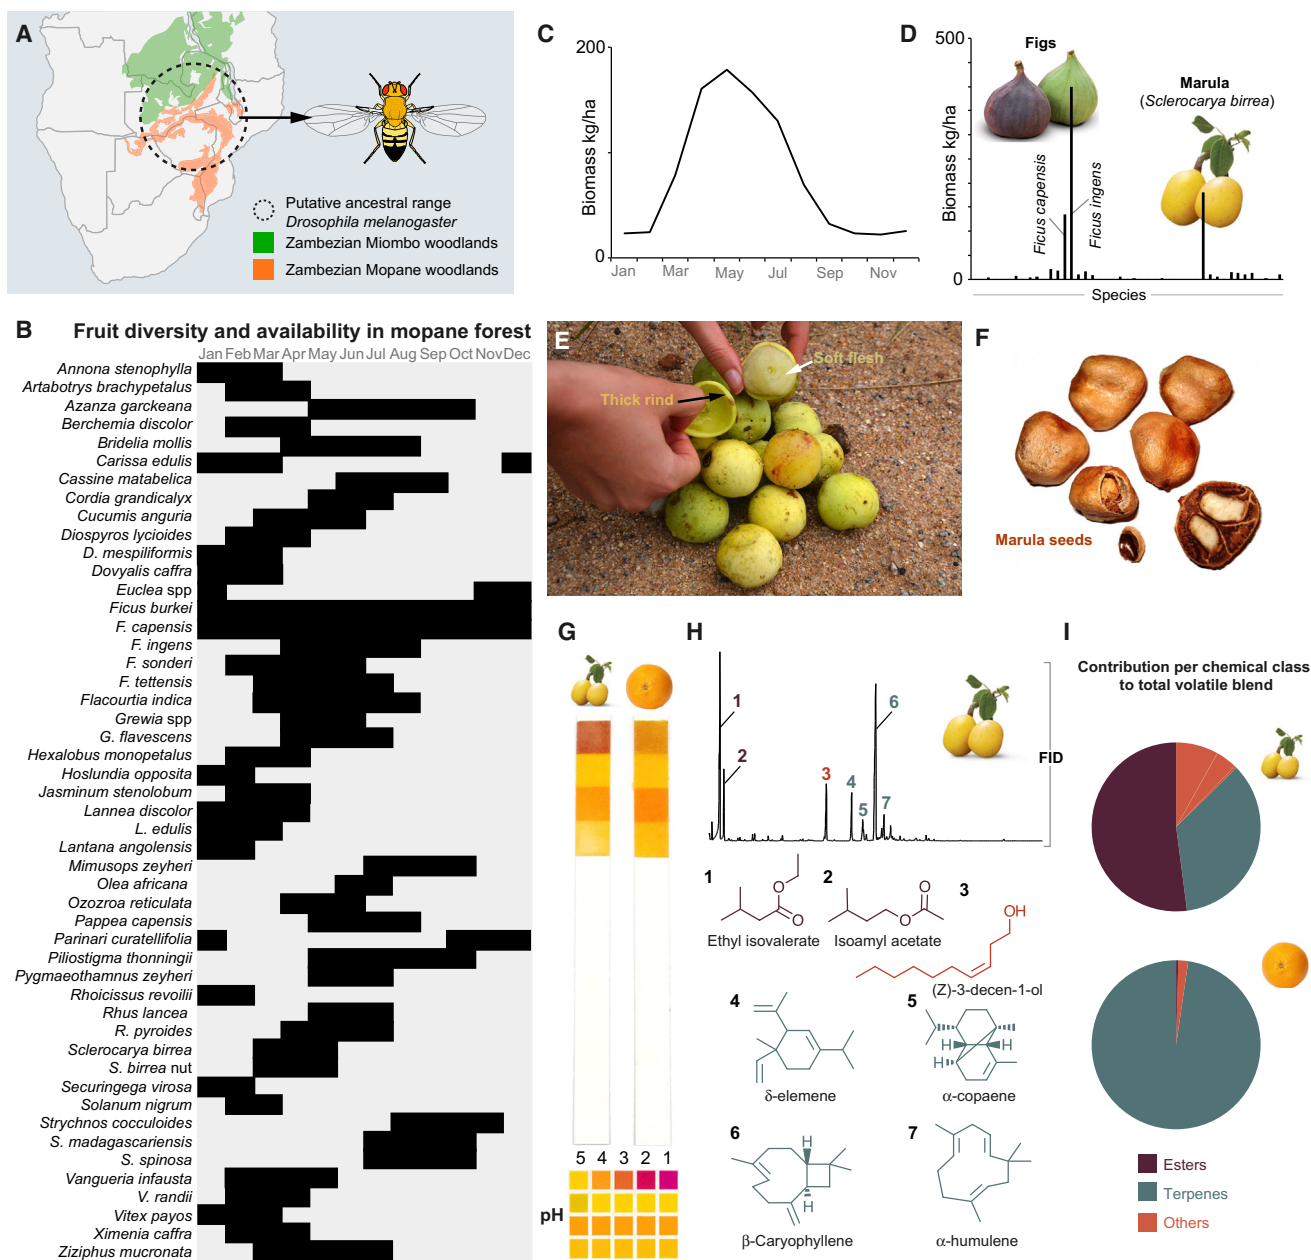

**Figure 1. Fruit Diversity in a Mopane Forest and Marula Characteristics**

(A) Predicted ancestral range of *D. melanogaster* and the dominant vegetation zones.

(B–D) Diversity and availability of fruit in a Mopane forest (B), Total fruit biomass per month (C), and yearly biomass per fruit variety (D) (as listed in B). Data from the Matopos national park and adapted from [7].

(E and F) Ripe marula (*Sclerocarya birrea*) fruit (E) (photo: E.V. Jirle), and marula seeds (F).

(G) pH test sticks exposed to marula (left) and orange (right) fruit pulp, with scale below (pH 1–5).

(H) Flame ionization detection (FID) traces from a headspace collection of marula volatiles. Numbers refer to the primary volatile constituents, the structures of which are shown below. Color code is as per (I).

(I) Contribution (%) per chemical class to the total volatile blend of marula (above) and orange (below).

See also Figure S1.

among which we placed fly traps baited with marula. Over the next days, these traps caught numerous *D. melanogaster* ( $n = 147$  from this single site). Traps placed under an additional 5 marula trees yielded another 67 *D. melanogaster* specimens (Figure 2E). At all examined sites, though, *D. simulans*

outnumbered *D. melanogaster* (Figure 2F). We hereafter refer to these flies as “wild,” in line with their presence in undisturbed wilderness, with the caveat that their ultimate origin remains unknown. For more information about these flies and other *D. melanogaster* specimens caught from wilderness areas in

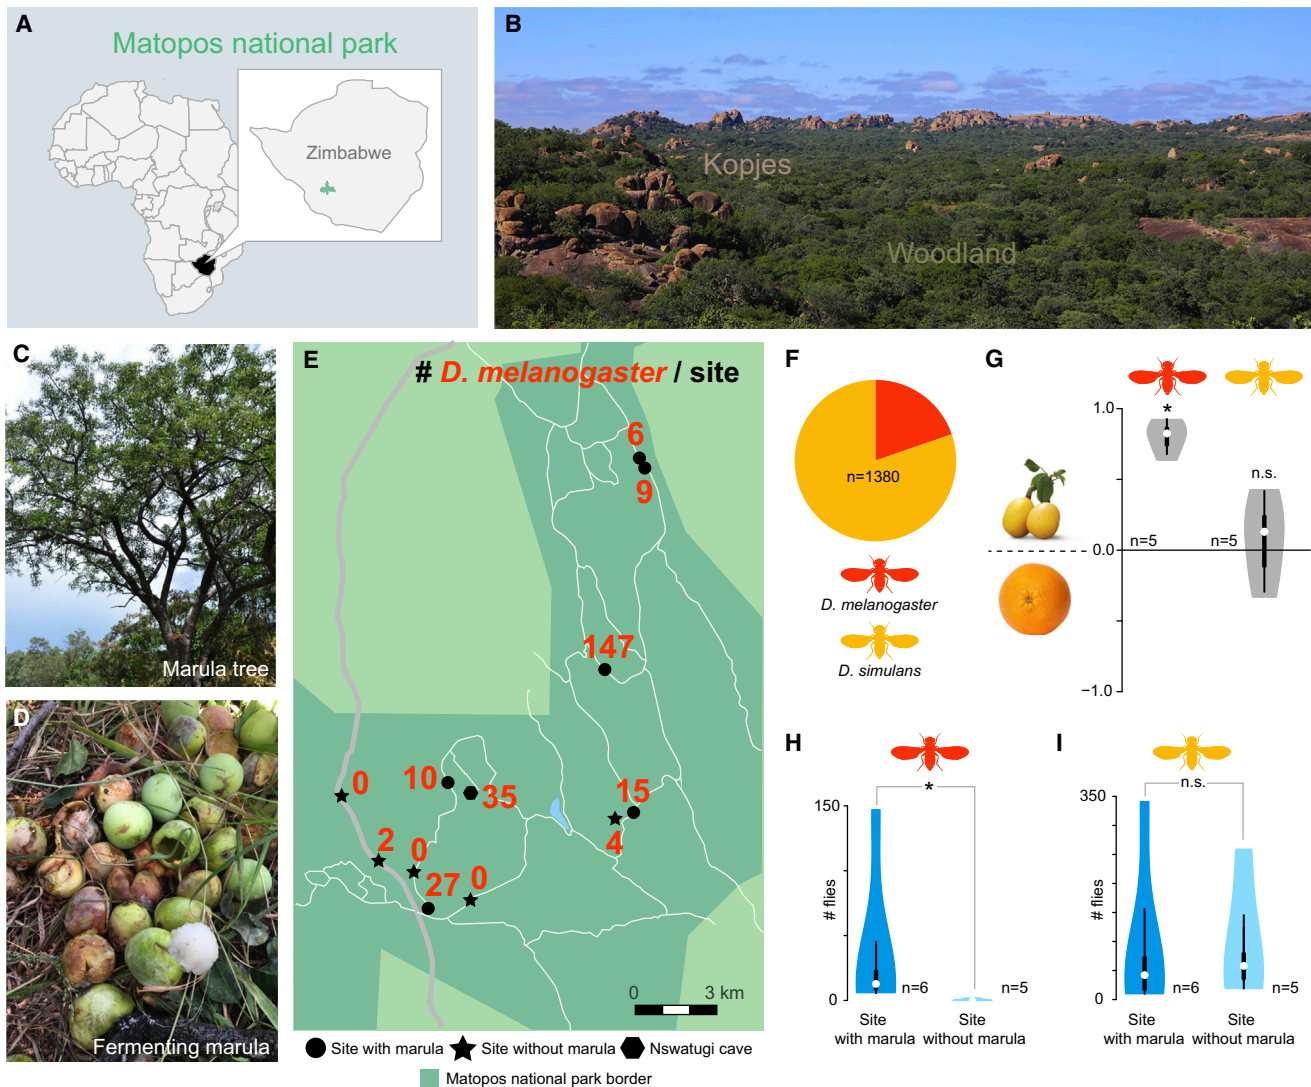

**Figure 2. Wild *D. melanogaster* from Mopane Woodlands Are Closely Associated with Marula**

(A) Location of the Matopos National Park, Zimbabwe.

(B) View of the park, showing extensive mopane woodland cover with interspersed kopje rock formations. Photo: M. Stensmyr.

(C and D) A marula (*Sclerocarya birrea*) tree (C) and fermenting fruit (D). Photo: E.V. Jirle and M. Stensmyr.

(E) The Matopos national park and the collection sites with total numbers of specimens of *Drosophila melanogaster* caught.

(F) Proportion of *D. melanogaster* to *Drosophila simulans* from all collection sites.

(G) Violin plots showing oviposition indices (OI) of wild *D. melanogaster* and *D. simulans* (color code as per F) provided a choice between traps baited with marula or orange. White circles show the median, and boxes show the 25th–75th percentiles, which are extended by whiskers indicating 1.5× the interquartile range from the 25th–75th percentiles; the shape denotes the density estimate and extends to extreme values. Deviation of the OI against zero was analyzed for significance (\* $p < 0.05$ ) with a one-sample Wilcoxon test ( $p < 0.05$ ).

(H and I) Violin plots showing the number of *D. melanogaster* (H) and *D. simulans* (I) caught at sites with or without marula. Violin plots are as per (G). Differences between the means were analyzed for significance (\*) with a Mann-Whitney *U* test ( $p < 0.05$ ).

Southern Africa, we refer interested readers to an accompanying paper [9].

We next provided the forest flies with a choice of marula versus orange, the favorite breeding substrate of domestic *D. melanogaster* [5]. We placed paired traps, containing either marula or orange, under a fruiting marula tree. Similar to the laboratory strain, the wild *D. melanogaster* showed a strong preference for marula (Figure 2G). Interestingly, though, *D. simulans*

displayed no such preference (Figure 2G), indicating that the marula preference is exclusive to *D. melanogaster* and, moreover, that marula is not simply overall a more suitable fruit resource to *Drosophila* spp. We next dissected marula in search of fly eggs and larvae, and in all fruit examined, we localized drosophilid larvae, from which *D. melanogaster* adults later emerged. In short, wild African *D. melanogaster* are drawn to the odor of marula, prefer marula to orange, and use marula as breeding substrate.



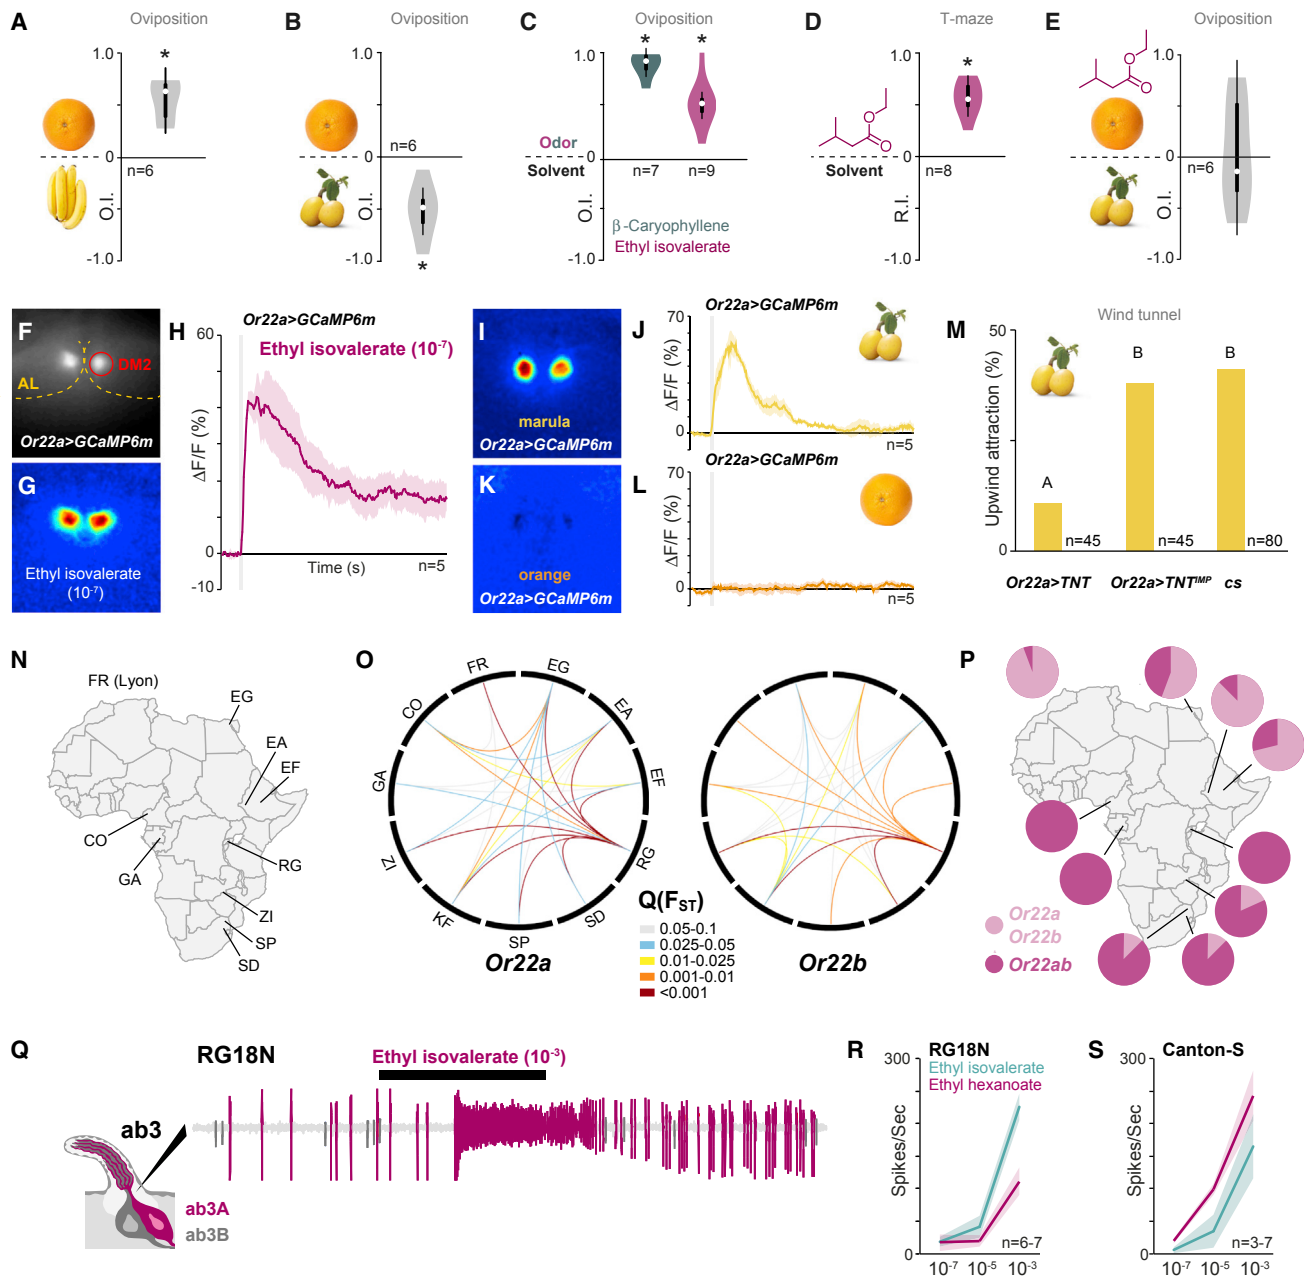

**Figure 3. Wild *D. melanogaster* from Mopane Woodlands Are Closely Associated with Marula**

(A) Violin plots showing oviposition indices (OI) of Canton-S flies from a binary-choice test between standard cornmeal fly food mixed with orange or banana pulp. Violin plots are as per Figure 2G. Deviation of the OI against zero was analyzed for significance (\*) with a one-sample Wilcoxon test ( $p < 0.05$ ). (B and C) Violin plots showing OI of Canton-S flies from a binary-choice test between standard cornmeal fly food mixed with orange or marula pulp (B) or fly food mixed with  $\beta$ -caryophyllene or ethyl isovalerate (C) against fly food alone. Violin plots are as per Figure 2G. Deviation of the OI against zero was analyzed for significance (\*) with a one-sample Wilcoxon test ( $p < 0.05$ ). (D) Violin plots showing the response index (RI) of Canton-S flies toward ethyl isovalerate ( $10^{-4}$ ) in a mini T-maze (depicted left). Violin plots are as per Figure 2G. Deviation of the RI against zero was analyzed for significance (\*) with a one-sample Wilcoxon test ( $p < 0.05$ ). (E) Violin plots showing OI of Canton-S flies from a binary-choice test between standard cornmeal fly food mixed with orange and ethyl isovalerate against fly food with marula. Violin plots are as per Figure 2G. Deviation of the OI against zero was analyzed for significance (\*) with a one-sample Wilcoxon test ( $p < 0.05$ ). (F) Prestimulation view of *Or22a-Gal4>UAS-GCaMP6m* showing intrinsic fluorescence from the DM2 glomerulus. (G) Pseudocolored image showing ethyl isovalerate-induced fluorescence changes in the antennal lobe (AL) of a *Or22a-Gal4>UAS-GCaMP6m* fly. (H) Averaged traces from DM2 glomerulus of *Or22a-Gal4>UAS-GCaMP6m* flies stimulated with ethyl isovalerate. Shaded areas represent SEM. The gray bar represents the stimulus duration (1 s). (I and J) Pseudocolored image showing marula- (I) and orange- (J) induced fluorescence changes in the AL of *Or22a-Gal4>UAS-GCaMP6m* flies.

(legend continued on next page)

## Wild *D. melanogaster* Are Seasonal Specialists on Marula

To investigate the general distribution of *D. melanogaster* in the Matopos, we next placed traps (baited with fermenting marula) at locations ( $n = 5$ ) with no fruiting marula trees nearby, but with otherwise similar vegetation (including other fruiting trees). Strikingly, *D. melanogaster* was absent, or very sparse, in traps at these locations (Figure 2H). On the other hand, *D. simulans* was as abundant at sites with marula as it was in sites without (Figure 2I). The distribution pattern of *D. melanogaster* in the Matopos hence indicates niche confinement and, in turn, a specialized lifestyle. *D. melanogaster* as a seasonal fruit specialist would actually not be surprising given (1) the scarcity of the species in Miombo and Mopane forests outside of marula season [9], (2) the observed presence of a distinct egg-laying preference [5], and (3) the fact that host specialization is a prevalent feature in the *melanogaster* subgroup. *Drosophila sechellia* exclusively breeds in noni fruit [10], whereas *Drosophila erecta* and *Drosophila orena* are seasonal specialists on *Pandanus* cones [2] and *Syzygium* waterberries [11] respectively. *Drosophila teissieri* is closely associated with *Parinari* fruit, which limits its geographic range [2, 11, 12], whereas *Drosophila santomea* is found with figs from *Ficus clamydorpha* trees [13]. Thus, seasonal host specialization in *D. melanogaster* would fall into the pattern displayed by most (if not all) of its close relatives. Outside of marula season, these forest flies may go into diapause, much like they do in temperate regions [14], or switch to opportunism, utilizing alternate breeding substrates. One such alternative could be figs, which are present year-round in the Matopos (Figure 1B) and in terms of biomass are even more abundant than marula (Figure 1D). *D. melanogaster* has moreover been reared from figs in Africa [15], which are also an alternate host for the seasonal specialist *D. erecta* outside of *Pandanus* season [16].

## Laboratory *D. melanogaster* Shows Oviposition Preference for Marula and Marula Volatiles

Wild African *D. melanogaster* hence not only utilize marula for parts of the year, marula appears to be exclusively utilized. We next wondered how domestic flies react to this fruit. To this end, we used a two-choice assay [17] to examine egg-laying preference in Canton-Special (Canton-S) wild-type flies. The Canton-S strain was established sometime before 1916 from a population in Canton, Ohio [18], well outside the sub-Saharan range of marula. We first verified the citrus preference of these

flies in the oviposition assay. Given a choice between orange and banana, the flies clearly preferred citrus as oviposition substrate (Figure 3A). Having confirmed the assay, we subsequently tested orange versus marula, and indeed, flies provided this choice strongly preferred marula, similar to Wild African *D. melanogaster* (Figure 3B). The ancestral marula preference is accordingly conserved in non-African flies.

Which chemicals then mediate the marula preference? We used the same two-choice assay and next tested the major chemical components of the headspace individually. We have previously shown that fly food spiked with terpenes confers positive egg-laying site selection [5], and thus we only re-tested the main terpene ( $\beta$ -caryophyllene), which as expected generated preferential oviposition (Figure 3C). The main ester component, ethyl isovalerate, also conferred oviposition preference (Figure 3C), as well as attraction in a T-maze assay (Figure 3D). The preference of marula over orange may hence be mediated by the high presence of esters in the former. In line with this reasoning, flies provided with a choice of orange spiked with ethyl isovalerate against marula failed to make a choice (Figure 3E).

## The Marula Volatile Ethyl Isovalerate Activates Or22a-Expressing Neurons

In *D. sechellia* and *D. erecta*, host specialization is linked to the *Or22a* circuit, which in both species is activated by distinct esters from the respective hosts [3, 4]. We thus wondered whether the primary marula ester ethyl isovalerate also activates Or22a-expressing olfactory sensory neurons (OSNs) in *D. melanogaster*. To investigate this issue, we performed functional imaging of the antennal lobe in flies expressing the calcium reporter GCaMP6m [19] under the control of *Or22a-Gal4* [20] (Figure 3F). Stimulation with ethyl isovalerate yielded strong calcium signals in the DM2 glomerulus (the target of the Or22a-expressing OSNs [20, 21]) already at  $10^{-7}$  dilution (Figure 3G, H). In line with its chemistry, marula odor also triggered strong  $Ca^{2+}$  signals from DM2 (Figures 3I and 3J), whereas orange odor triggered weak to no activity from the same glomerulus (Figures 3K and 3L). Thus, similar to its specialized siblings, the main ester from the preferred host activates Or22a. Silencing of the *Or22a* pathway via *Or22a-Gal4>UAS-TNT* did not, however, abolish the marula oviposition preference (data not shown), suggesting that additional pathways are involved in this behavior. Rather than mediating egg-laying preference, the primary function of Or22a may instead be locating the host over distance. Hence,

(K and L) Averaged traces from DM2 glomerulus of *Or22a-Gal4>UAS-GCaMP6m* flies stimulated with marula (K) and orange (L). Shaded areas represent SEM. The gray bar represents the stimulus duration (0.5 s).

(M) Marula-odor-mediated upwind flight attraction of *Or22a-Gal4>UAS-TNT* flies in comparison to *Or22a-Gal4>UAS-TNT<sup>IMP</sup>* and Canton-S (cs). Bars labeled with different letters indicate significant difference as analyzed by a binomial generalized linear model (GLM) followed by Tukey's test ( $p < 0.05$ ).

(N) Geographic origin of examined *D. melanogaster* populations. Abbreviations are as per [5].

(O) Genetic differentiation among populations at *Or22a* and *Or22b* is depicted via Circos plots [39] based on  $F_{ST}$  quantiles ( $Q(F_{ST})$ ). Only connections between populations with unusually high  $F_{ST}$  values (elevated genetic differentiation) are shown. The red color, for example, indicates that between this pair of populations, less than 0.1% of windows on the same chromosome arm have an  $F_{ST}$  value this high.

(P) Frequency of the *Or22ab* allele across the examined *D. melanogaster* populations.

(Q) Representative single sensillum recording trace from an ab3 sensillum. The larger-amplitude spiking neuron, i.e., ab3A, responds to ethyl isovalerate. The duration of stimulus delivery (0.5 s) is marked by the black bar.

(R) Dose-response curve of ab3A neurons from the RG18N strain and Canton-S (S) toward ethyl isovalerate and ethyl hexanoate. Shaded area shows the standard deviation.

See also Figures S2 and S3.

we next examined up-wind flight navigation toward marula of flies with *Or22a* silenced (via *Or22a-Gal4>UAS-TNT*) in a wind tunnel assay [22]. Flies with non-functional *Or22a* input showed a reduced ability to localize marula compared to control flies (Figure 3M), suggesting that these neurons' predominant function is to assist the fly in locating its host over distance. The importance of these neurons in this context is also evident from *D. sechellia*, which has a numerical increase of *Or22a*-expressing OSNs, which likely affords an improved ability to find noni over distance [3].

### Or22a Shows Signs of Local Adaptation

Since marula is restricted to sub-Saharan Africa, most *D. melanogaster* have to make do with alternative hosts. If *Or22a* indeed is linked to the specific chemistry of the host, we would accordingly expect to see local adaptation of the *Or22a* locus between *D. melanogaster* populations from diverse environments that may utilize disparate hosts. Thus, we next estimated local genetic differentiation (as indexed by  $F_{ST}$  [23, 24]) within the OR family between genomes from 10 African populations, plus one European (Figure 3N). For each window centered on an olfactory receptor gene, we then evaluated the  $F_{ST}$  quantile for each pairwise population comparison (the proportion of all windows on the same chromosome arm that showed stronger allele frequency differences [higher  $F_{ST}$ ]) between these same two populations (Figure 3O). The *Or22a* locus, and the adjacent tandem paralog *Or22b*, shows striking genetic differentiation between almost all population pairs (Figure 3O), in stark contrast to most of the other ORs, for which little or no sign of local adaptation can be discerned (Figure S2).

In cases where other ORs did show strong  $F_{ST}$  outliers (quantiles < 0.0001), differentiation in one or a few populations was often most apparent. These genes included *Or33a*, *Or65b*, and *Or67a* (Figure S2). Interestingly, these receptors also appear to have important functions. *Or33a* has unknown function [25], but like *Or22a*, it shows variable expression across species [26]. *Or67a* detects aromatic esters (e.g., methyl benzoate) [27] and has undergone serial duplication in *Drosophila sukuzii* and *Drosophila biarmipes* [28]. *Or65b* is expressed in pheromone-sensing neurons [29], but its function has not been established. In short, unlike most members of the OR family in *D. melanogaster*, *Or22a* (and its closely linked paralog, *Or22b*) shows strong signs of local adaptation, in line with a function associated with host-specific chemistry.

At the molecular level, *Or22a* (and *Or22b*) thus differs between populations, but does this local differentiation also translate into functional changes in the ab3A neurons where these genes are expressed [20, 21]? The most conspicuous alteration among the investigated populations in the *Or22a/Or22b* locus is a deletion allele, whereby a segment stretching from the second exon of *Or22a* to the start of the second exon of *Or22b* has been deleted, generating a chimeric receptor, *Or22ab* (Figure S3A) [30]. In light of the chimeric appearance of *Or22ab*, this variant appears to be a derived deletion (following a more ancient duplication to create these paralogs), rather than a representation of the ancestral state of the *Or22* locus [30].

Our data support the prior suggestion [30] that the *Or22ab* fusion variant is quite ancient. This variant is at a very high frequency within the ancestral range (e.g., 88% in Zambia).

Nucleotide diversity of flanking sequences, which should accrue on the order of  $4 N_e \approx 10$  million generations in this species, is at or above typical levels among Zambia haplotypes carrying this deletion (Figure S3B). Hence, it is likely that the fusion variant existed well before the species expanded beyond its ancestral range on the order of 150,000 generations ago, or  $\sim 10,000$  years ago [9, 31]. In contrast, putatively ancestral full-length *Or22a/Or22b* haplotypes from Zambia show strongly reduced diversity across the deletion region (Figure S3B). This pattern could reflect a low long-term population size of the full-length allele, in accordance with its current rarity in the ancestral range. In some populations, such as in Europe or the Ethiopian highlands, the full-length allele has become predominant (Figure 3P). Many of these haplotypes show identical or nearly identical sequences (Figures S3C and S3D), in line with prior evidence for positive selection linked to the *Or22a/Or22b* haplotype in Europe [30]. We note that some populations with similarly high frequencies of the fusion variant are strongly differentiated from each other at the *Or22a/b* locus (Figure 3O), which could imply either parallel increases of the fusion variant on distinct haplotypes or additional variants under spatially varying selection at this locus.

Consequently, most *D. melanogaster* in Southern Africa will likely carry the *Or22ab* allele, which prompts the question: do their ab3A neurons respond to the marula ester? We selected a strain in which *Or22ab* is fixed (RG18N) and subsequently performed single-sensillum recordings (SSRs). Measurements from ab3A neurons revealed strong responses to stimulation with ethyl isovalerate (Figure 3Q). The ab3A neurons in RG18N actually responded more strongly to ethyl isovalerate than to ethyl hexanoate—the primary ligand of *Or22a* [27] (Figure 3R)—in contrast to ab3A neurons from Canton-S flies (which carry both *Or22a* and *Or22b* [32]), where ethyl hexanoate yielded a stronger response than ethyl isovalerate (Figure 3S). In short, African *D. melanogaster* not only detect ethyl isovalerate, but also are even more sensitive to this marula compound than flies from outside Africa. We note that the distribution of populations with a high frequency of *Or22ab* overlaps with the distribution of marula. However, whether the *Or22ab* allele is an adaptation toward marula remains to be shown. Heterologous expression and detailed functional characterization of this interesting receptor variant will be a topic for future studies.

### Marula as a Vehicle for the Domestication of *D. melanogaster*

The Matopos is best known for its elaborately painted caves (Figure 4A)—made by now-vanished San tribes during Late Pleistocene to Early Holocene [7]. For these tribes, marula played a pivotal role, and archeological excavations of their cave homes have uncovered enormous quantities of marula stones [7, 33] (Figure 1F). From the Pomongwe cave alone, remains of at least 24 million marula stones were recovered, which only represents the carbonized remains, and hence but a fraction of the marula that must have once been brought into this cave [33]. The San evidently spent considerable time collecting and processing marula, which would have been the staple food item during many months of the year. Thus, just like *D. melanogaster*, these San tribes appear to have been seasonal specialists on marula as well.



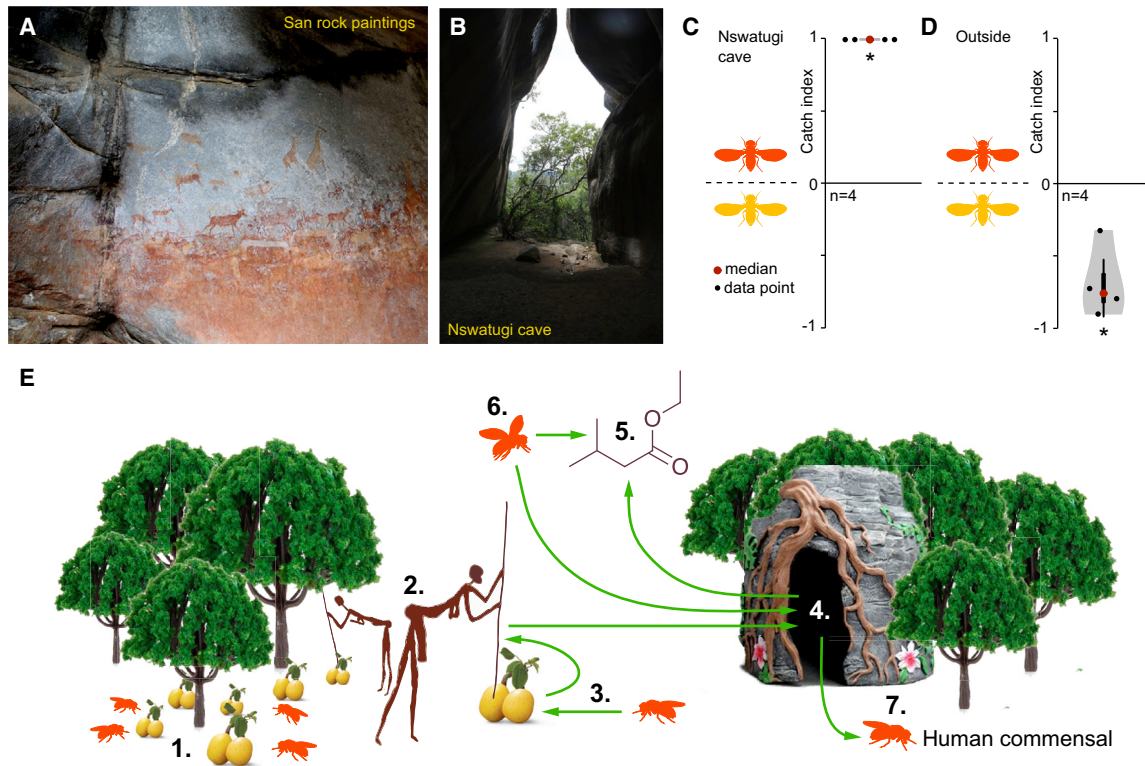

**Figure 4. Marula and the Domestication of *D. melanogaster***

(A) San rock paintings from the Nswatugi cave depicting the local wildlife. Photo: M. Stensmyr.

(B) View from inside the Nswatugi cave. Photo: M. Stensmyr.

(C and D) Violin plots showing proportion of wild *D. melanogaster* and *D. simulans* caught in traps placed inside Nswatugi cave (C), and outside (D). Violin plots are as per Figure 2G. Deviation of the OI against zero was analyzed for significance (\*) with a one-sample Wilcoxon test ( $p < 0.05$ ).

(E) Schematic model of the process leading up to commensalism. Wild *D. melanogaster* on fallen marula (1), a resource of equal importance to now-extinct San hunter-gatherers (2) (adapted from [33]) that co-inhabited the same habitat. The San brought large numbers of marula into their cave homes, and with the fruit likely also flies (3). The massive amounts of marula that evidently were stored in these caves (4) would have generated a potent scent trail, dominated by ethyl isovalerate (5), attracting flies (6). Inside the caves, flies would have adapted to their new environment and preference of their close neighbors, ultimately leaving as human commensals (7).

The marula-San link offers a plausible scenario by which *D. melanogaster* became a human commensal. The smell of the stored marula emanating from the caves would have attracted flies from far and wide. Flies would have found a steady supply of marula and fermenting leftovers inside the caves, long after the fruit's presence in the surrounding woodlands had diminished. In other words, the time frame for using the optimal breeding substrate would have been increased considerably. Inside the caves, the flies would also have benefitted from a reduced risk of predation, as well as protection from adverse weather conditions. Over time, the cave flies would have accumulated adaptations helpful for human commensalism. Relevant traits may have included a willingness to enter darker enclosures [34] and an increased tolerance of ethanol, both of which differentiate *D. melanogaster* from its closest relatives [35]. Thus, we next wondered whether *D. melanogaster* actually enter these caves. To this end, we placed traps ( $n = 4$ ) baited with fermenting marula along the far wall of the Nswatugi cave [7] (Figure 4B). Over three days, these traps caught a number of *D. melanogaster* specimens ( $n = 35$ ), but no *D. simulans* (Figure 4C), in contrast to the

closest traps ( $n = 3$ ) placed under fruiting marula trees outside the cave, where *D. simulans* greatly outnumbered *D. melanogaster* (Figure 4D).

The archeological record indicates that systematic and intensive marula use began  $\sim 12,000$  years ago. At  $\sim 9,500$  years ago, marula harvesting reached massive proportions, finally ebbing out  $\sim 8,000$  years ago [7]. These dates coincide with demographic data from *D. melanogaster*, which point to a within-Africa expansion starting  $\sim 10,000$  years ago [9, 31], an expansion presumably representing the dispersal of the commensal population throughout its new niche. In short, archeological and demographic data would support the notion that marula use by the San may have been a factor in turning the woodland species *D. melanogaster* into the cosmopolitan species of today (Figure 4E).

### Conclusions

We have here demonstrated that *D. melanogaster* from a mopane forest within the predicted ancestral range are seasonal specialists on marula fruit. The odor of this seasonally abundant and widely distributed fruit activates select key odorant



receptors previously implicated as having particular importance to *D. melanogaster*, and we argue that marula is the ancestral primary host of the fly. We moreover show that flies from sub-Saharan Africa carry a specific allele of one of these odorant receptors and are also more responsive to a key marula chemical. Finally, we speculate that the marula specialization might have been important in driving commensalism.

The finding of a woodland population of *D. melanogaster* within the ancestral habitat opens up a range of interesting questions to be addressed. For example, how do these flies differ from their commensal relatives, i.e., which genetic factors underlie this shift in lifestyle? The finding that *D. melanogaster* appears to have a close association with a single host fruit will furthermore facilitate studies relating to host specific chemosensory adaptations, which so far have had to be conducted in other insects in which the wealth of tools available in *D. melanogaster* are unavailable.

## STAR★METHODS

Detailed methods are provided in the online version of this paper and include the following:

- KEY RESOURCES TABLE
- CONTACT FOR REAGENT AND RESOURCE SHARING
- EXPERIMENTAL MODEL AND SUBJECT DETAILS
  - Fly collections and husbandry
- METHOD DETAILS
  - Odor analysis and GC-MS
  - Electrophysiology
  - *In vivo* calcium imaging
  - Behavioral experiments
  - Population genetic analysis
- QUANTIFICATION AND STATISTICAL ANALYSIS

## SUPPLEMENTAL INFORMATION

Supplemental Information includes three figures and can be found with this article online at <https://doi.org/10.1016/j.cub.2018.10.033>.

## ACKNOWLEDGMENTS

We thank Drs. Matthew Cobb, Lucia Prieto-Godino, and Daniel R. Matute for valuable comments and Dr. Nicholas J. Walker for kindly providing information regarding the San, marula, and the Matopos. We also wish to thank Dr. Helena Fritz, Latifa Mrisho, and Lovisa Pettersson for assistance. Work in the Stensmyr lab is funded by the Crafoord Foundation, Carl-Tryggers Foundation, and the Swedish Research Council. The Pool lab acknowledges funding from the NIH (R01 GM111797).

## AUTHOR CONTRIBUTIONS

Conceptualization, S.M. and M.C.S.; Methodology, J.E.P., and M.C.S.; Investigation, S.M., A.E., V.R., G.R., P.G.B., J.E.P., and M.C.S.; Resources, P.G.B., J.E.P., and M.C.S.; Writing – Original Draft, M.C.S.; Writing – Review & Editing, all authors; Funding Acquisition, J.E.P., and M.C.S.; Supervision, J.E.P., and M.C.S.

## DECLARATION OF INTERESTS

All authors declare no financial interests.

Received: May 28, 2018

Revised: September 12, 2018

Accepted: October 9, 2018

Published: December 6, 2018

## REFERENCES

1. Lachaise, D., and Silvain, J.F. (2004). How two Afrotropical endemics made two cosmopolitan human commensals: the *Drosophila melanogaster*-*D. simulans* palaeogeographic riddle. *Genetica* 120, 17–39.
2. Rio, B., Couturier, G., Lemeunier, F., and Lachaise, D. (1983). Evolution d'une spécialisation saisonnière chez *Drosophila erecta* (Dipt., Drosophilidae). *Ann. Soc. Entomol. Fr.* 19, 235–248.
3. Dekker, T., Ibba, I., Siju, K.P., Stensmyr, M.C., and Hansson, B.S. (2006). Olfactory shifts parallel superspecialism for toxic fruit in *Drosophila melanogaster* sibling, *D. sechellia*. *Curr. Biol.* 16, 101–109.
4. Linz, J., Baschwitz, A., Strutz, A., Dweck, H.K.M., Sachse, S., Hansson, B.S., and Stensmyr, M.C. (2013). Host plant-driven sensory specialization in *Drosophila erecta*. *Proc. Biol. Sci.* 280, 20130626.
5. Dweck, H.K.M., Ebrahim, S.A.M., Kromann, S., Bown, D., Hillbur, Y., Sachse, S., Hansson, B.S., and Stensmyr, M.C. (2013). Olfactory preference for egg laying on citrus substrates in *Drosophila*. *Curr. Biol.* 23, 2472–2480.
6. Pool, J.E., Corbett-Detig, R.B., Sugino, R.P., Stevens, K.A., Cardeno, C.M., Crepeau, M.W., Duchon, P., Emerson, J.J., Saelao, P., Begun, D.J., and Langley, C.H. (2012). Population Genomics of sub-saharan *Drosophila melanogaster*: African diversity and non-African admixture. *PLoS Genet.* 8, e1003080.
7. Walker, N.J. (1995). Late Pleistocene and Holocene Hunter-Gatherers of the Matopos: An Archaeological Study of Change and Continuity in Zimbabwe (Societas Archaeologica Upsaliensis).
8. Mansourian, S., and Stensmyr, M.C. (2015). The chemical ecology of the fly. *Curr. Opin. Neurobiol.* 34, 95–102.
9. Sprengelmeyer, Q.D., Mansourian, S., Lange, J.D., Matute, D.R., Cooper, B.S., Jirle, E.V., Stensmyr, M.C., and Pool, J.P. (2018). Discovery of *Drosophila melanogaster* from wild African environments and genomic insights into species history. *bioRxiv*. <https://doi.org/10.1101/470765>.
10. Tsacas, L., and Bächli, G. (1981). *Drosophila sechellia*. n. sp., huitième espèce du sous-groupe *melanogaster* des îles Seychelles (Diptera, Drosophilidae). *Rev. Fr. Entomol.* 3, 146–150.
11. Comeault, A.A., Serrato-Capuchina, A., Turissini, D.A., McLaughlin, P.J., David, J.R., and Matute, D.R. (2017). A nonrandom subset of olfactory genes is associated with host preference in the fruit fly *Drosophila oreana*. *Evol. Lett.* 1, 73–85.
12. David, J.R., Lemeunier, F., Tsacas, L., and Yassin, A. (2007). The historical discovery of the nine species in the *Drosophila melanogaster* species subgroup. *Genetics* 177, 1969–1973.
13. Llopart, A., Lachaise, D., and Coyne, J.A. (2005). An anomalous hybrid zone in *Drosophila*. *Evolution* 59, 2602–2607.
14. Schmidt, P.S., and Conde, D.R. (2006). Environmental heterogeneity and the maintenance of genetic variation for reproductive diapause in *Drosophila melanogaster*. *Evolution* 60, 1602–1611.
15. Lachaise, D. (1974). Les drosophilidae des savanes préforestières de la région tropicale de Lamto (Côte-d'Ivoire). IV. b. – Synecologie fonctionnelle du peuplement de *Ficus capensis*. *Bull. Ecol.* 7, 79–104.
16. Lachaise, D., and Tsacas, L. (1974). Les drosophilidae des savanes préforestières de la région tropicale de Lamto (Côte-d'Ivoire). 2. Le peuplement des fruits de *Pandanus candelabrum* (Pandanales). *Ann. Univ. d'Abidjan* 7, 153–192.
17. Mansourian, S., Corcoran, J., Enjin, A., Löfstedt, C., Dacke, M., and Stensmyr, M.C. (2016). Fecal-derived phenol induces egg-laying aversion in *Drosophila*. *Curr. Biol.* 26, 2762–2769.
18. Bridges, C.B. (1916). Non-disjunction as proof of the chromosome theory of heredity (concluded). *Genetics* 1, 107–163.

19. Chen, T.W., Wardill, T.J., Sun, Y., Pulver, S.R., Renninger, S.L., Baohan, A., Schreiter, E.R., Kerr, R.A., Orger, M.B., Jayaraman, V., et al. (2013). Ultrasensitive fluorescent proteins for imaging neuronal activity. *Nature* **499**, 295–300.
20. Fishilevich, E., and Vosshall, L.B. (2005). Genetic and functional subdivision of the *Drosophila* antennal lobe. *Curr. Biol.* **15**, 1548–1553.
21. Couto, A., Alenius, M., and Dickson, B.J. (2005). Molecular, anatomical, and functional organization of the *Drosophila* olfactory system. *Curr. Biol.* **15**, 1535–1547.
22. Becher, P.G., Bengtsson, M., Hansson, B.S., and Witzgall, P. (2010). Flying the fly: long-range flight behavior of *Drosophila melanogaster* to attractive odors. *J. Chem. Ecol.* **36**, 599–607.
23. Wright, S. (1931). Evolution in Mendelian populations. *Genetics* **16**, 97–159.
24. Hudson, R.R., Slatkin, M., and Maddison, W.P. (1992). Estimation of levels of gene flow from DNA sequence data. *Genetics* **132**, 583–589.
25. Stensmyr, M.C., Dweck, H.K.M., Farhan, A., Ibba, I., Strutz, A., Mukunda, L., Linz, J., Grabe, V., Steck, K., Lavista-Llanos, S., et al. (2012). A conserved dedicated olfactory circuit for detecting harmful microbes in *Drosophila*. *Cell* **151**, 1345–1357.
26. Pan, J.W., Li, Q., Barish, S., Okuwa, S., Zhao, S., Soeder, C., Kanke, M., Jones, C.D., and Volkan, P.C. (2017). Patterns of transcriptional parallelism and variation in the developing olfactory system of *Drosophila* species. *Sci. Rep.* **7**, 8804.
27. Münch, D., and Galizia, C.G. (2016). DoOR 2.0—Comprehensive mapping of *Drosophila melanogaster* odorant responses. *Sci. Rep.* **6**, 21841.
28. Ramasamy, S., Ometto, L., Crava, C.M., Revadi, S., Kaur, R., Horner, D.S., Pisani, D., Dekker, T., Anfora, G., and Rota-Stabelli, O. (2016). The evolution of olfactory gene families in *Drosophila* and the genomic basis of chemical-ecological adaptation in *Drosophila suzukii*. *Genome Biol. Evol.* **8**, 2297–2311.
29. van der Goes van Naters, W., and Carlson, J.R. (2007). Receptors and neurons for fly odors in *Drosophila*. *Curr. Biol.* **17**, 606–612.
30. Aguadé, M. (2009). Nucleotide and copy-number polymorphism at the odorant receptor genes *Or22a* and *Or22b* in *Drosophila melanogaster*. *Mol. Biol. Evol.* **26**, 61–70.
31. Kern, A.D., and Hey, J. (2017). Exact calculation of the joint allele frequency spectrum for isolation with migration models. *Genetics* **207**, 241–253.
32. Elya, C., Quan, A.S., Schiabor, K.M., and Eisen, M. (2017). Or22 allelic variation alone does not explain differences in discrimination of yeast-produced volatiles by *D. melanogaster*. *bioRxiv*, <https://doi.org/10.1101/186064>.
33. Walker, N.J. (1989). King of foods: marula economics in the Matobos. *Afr. Wildl.* **43**, 281–285.
34. David, J.R., Allemand, R., Capy, P., Chakir, M., Gibert, P., Pétavy, G., and Moreteau, B. (2004). Comparative life histories and ecophysiology of *Drosophila melanogaster* and *D. simulans*. *Genetica* **120**, 151–163.
35. McKenzie, J.A., and Parsons, P.A. (1972). Alcohol tolerance: an ecological parameter in the relative success of *Drosophila melanogaster* and *Drosophila simulans*. *Oecologia* **10**, 373–388.
36. Rueden, C.T., Schindelin, J., Hiner, M.C., DeZonia, B.E., Walter, A.E., Arena, E.T., and Eliceiri, K.W. (2017). ImageJ2: ImageJ for the next generation of scientific image data. *BMC Bioinform* **18**, 529.
37. Schindelin, J., Arganda-Carreras, I., Frise, E., Kaynig, V., Longair, M., Pietzsch, T., Preibisch, S., Rueden, C., Saalfeld, S., Schmid, B., et al. (2012). Fiji: an open-source platform for biological-image analysis. *Nat. Methods* **9**, 676–682.
38. Lack, J.B., Lange, J.D., Tang, A.D., Corbett-Detig, R.B., and Pool, J.E. (2016). A thousand fly genomes: an expanded *drosophila* genome nexus. *Mol. Biol. Evol.* **33**, 3308–3313.
39. Krzywinski, M., Schein, J., Birol, I., Connors, J., Gascoyne, R., Horsman, D., Jones, S.J., and Marra, M.A. (2009). Circos: an information aesthetic for comparative genomics. *Genome Res.* **19**, 1639–1645.

## STAR★METHODS

### KEY RESOURCES TABLE

| REAGENT or RESOURCE                           | SOURCE                                    | IDENTIFIER                                                                                                                                                                                                                          |
|-----------------------------------------------|-------------------------------------------|-------------------------------------------------------------------------------------------------------------------------------------------------------------------------------------------------------------------------------------|
| Biological Samples                            |                                           |                                                                                                                                                                                                                                     |
| Marula ( <i>Sclerocarya birrea</i> )          | Matopos forest                            | N/A                                                                                                                                                                                                                                 |
| Orange ( <i>Citrus X sinensis</i> )           | Ica Supermarket, Lund                     | N/A                                                                                                                                                                                                                                 |
| Chemicals, Peptides, and Recombinant Proteins |                                           |                                                                                                                                                                                                                                     |
| Ethyl isovalerate (CAS# 108-64-5)             | Sigma-Aldrich                             | Cat#112283                                                                                                                                                                                                                          |
| $\beta$ -caryophyllene (CAS# 87-44-5)         | Sigma-Aldrich                             | Cat#22075                                                                                                                                                                                                                           |
| Experimental Models: Organisms/Strains        |                                           |                                                                                                                                                                                                                                     |
| <i>D. melanogaster Or22a-Gal4</i>             | Bloomington Drosophila Stock Center       | BDSC:9951 and BDSC:9952                                                                                                                                                                                                             |
| <i>D. melanogaster 20XUAS-IVS- GCaMP6m</i>    | Bloomington Drosophila Stock Center       | BDSC: 42748 and BDSC:42750                                                                                                                                                                                                          |
| <i>D. melanogaster UAS-TeTxLC.tnt.E2</i>      | Bloomington Drosophila Stock Center       | BDSC: 28837                                                                                                                                                                                                                         |
| <i>D. melanogaster UAS-TeTxLC.(-)V.A2</i>     | Bloomington Drosophila Stock Center       | BDSC 28840                                                                                                                                                                                                                          |
| <i>D. melanogaster Canton-S(pecial)</i>       | Baumgartner lab, Lund university          | N/A                                                                                                                                                                                                                                 |
| <i>D. melanogaster RG18N</i>                  | Pool lab, University of Wisconsin-Madison | N/A                                                                                                                                                                                                                                 |
| <i>D. melanogaster Matopos wt</i>             | Matopos forest                            | N/A                                                                                                                                                                                                                                 |
| <i>D. simulans Matopos wt</i>                 | Matopos forest                            | N/A                                                                                                                                                                                                                                 |
| Software and Algorithms                       |                                           |                                                                                                                                                                                                                                     |
| Fiji                                          | [36, 37]                                  | <a href="https://Fiji.sc">https://Fiji.sc</a>                                                                                                                                                                                       |
| AutoSpike                                     | Syntech                                   | <a href="http://www.ockenfels-syntech.com/download-2/">http://www.ockenfels-syntech.com/download-2/</a>                                                                                                                             |
| Circos                                        | [39]                                      | <a href="http://www.circos.ca">http://www.circos.ca</a>                                                                                                                                                                             |
| Illustrator CC 21.02                          | Adobe                                     | <a href="https://www.adobe.com/">https://www.adobe.com/</a>                                                                                                                                                                         |
| Photoshop CC                                  | Adobe                                     | <a href="https://www.adobe.com/">https://www.adobe.com/</a>                                                                                                                                                                         |
| R                                             | R core team 2013                          | <a href="https://cran.r-project.org">https://cran.r-project.org</a>                                                                                                                                                                 |
| GC/MSD ChemStation                            | Agilent                                   | <a href="https://www.agilent.com/en/products/software-informatics/massspec-workstations/gc-msd-chemstation-software">https://www.agilent.com/en/products/software-informatics/massspec-workstations/gc-msd-chemstation-software</a> |
| NIS elements                                  | Nikon                                     | <a href="https://www.nikoninstruments.com/Products/Software">https://www.nikoninstruments.com/Products/Software</a>                                                                                                                 |

### CONTACT FOR REAGENT AND RESOURCE SHARING

Further information and requests for resources and reagents should be directed to and will be fulfilled by the Lead Contact, Marcus Stensmyr ([marcus.stensmyr@bio.lu.se](mailto:marcus.stensmyr@bio.lu.se)).

### EXPERIMENTAL MODEL AND SUBJECT DETAILS

#### Fly collections and husbandry

Field traps were made from standard 0.5l PET water bottles (purchased at a supermarket in Bulawayo, Zimbabwe) with a horizontal slit cut to allow flies to enter. The traps were baited with marula (or with oranges for certain experiments). The traps were placed at ground level in the vegetation. Flies were aspirated from the bottles, frozen and then transferred to 90% ethanol for later identification (using morphological characters). Laboratory strains of *D. melanogaster* were reared on standard yeast corn meal medium and kept at 23°C under a 12 h/12 h light cycle. The following strains were used; Canton-S (gift from Dr Stefan Baumgartner), *RG18N* (Pool lab), *Or22a-Gal4* (Sachse lab), *UAS-TeTxLC.tnt.E2* (BDSC 28837), *UAS-TeTxLC.(-)V.A2* (BDSC 28840), and *20XUAS-IVS- GCaMP6m* (BDSC 42748 and 42750).

### METHOD DETAILS

#### Odor analysis and GC-MS

Fruit collected in the field were enclosed in cooking bags (Matlagningspåse M, Toppits) and volatiles evacuated through custom made Tenax (GR 60/80, Grace Davison Discovery Science) filters for 2-3 h via modified aquarium pumps (of unknown original

make) drawing air at  $0.5 \text{ l min}^{-1}$ . The filters were subsequently flushed with heptane (Sigma). Eluates were then injected into an Agilent 7890A gas chromatograph equipped with a 5975C Network Mass Selective Detector (Agilent Technologies), fitted with a HP-5MS column (30 m, 0.25 mm, 0.25  $\mu\text{m}$ ). Helium was used as carrier gas at a constant flow of  $1 \text{ mL min}^{-1}$ . The oven temperature was set at  $60^\circ\text{C}$  for 1 min, which was followed by a heating gradient of  $10^\circ\text{C min}^{-1}$  to  $230^\circ\text{C}$ , and then held for 10 min. Chromatograms were analyzed using ChemStation (Agilent Technologies), with compounds tentatively identified by comparison to reference spectra in the NIST library and finally verified using synthetic standards of highest purity available (Sigma).

### Electrophysiology

For single sensillum recordings, flies were first aspirated, then inserted and immobilized in pipette tips (200  $\mu\text{l}$ , VWR). Recordings were performed using electrolytically sharpened (KNO<sub>2</sub>) tungsten microelectrodes (TW5-3, Harvard Apparatus). The recording electrode was positioned through a DC-3K/PM10 piezo driven micromanipulator (Märzhäuser), whereas the reference electrode was inserted into the eye using a manually controlled micromanipulator (MM-3, Narishige). Odors were delivered via a Syntech CS-55 stimulus controller into a humidified air stream ( $1 \text{ l min}^{-1}$ ) via cartridges made from Pasteur pipettes (VWR) containing a small piece of filter paper (0.5 cm x 0.5 cm, Grade: 1002, Munktel) soaked with 10  $\mu\text{l}$  of the stimulus solution, or solvent only. Stimulus duration was set to 0.5 s. Recordings were digitally converted via a IDAC 4 acquisition controller (Syntech) and stored on a PC (Custom configured) and analyzed (i.e., spikes sorted and counted) using the AutoSpike software (Syntech).

### In vivo calcium imaging

For imaging, flies were cold anesthetized and immobilized with paraffin wax on a custom made stage, the dorsal side of the head was then covered with artificial haemolymph solution and a small window opened in the cuticle to expose the brain. A pE-300 CoolLED (Nikon instruments) was used as light source (488 nm excitation, dichroic 500 nm, long-pass filter 515 nm) and emitted light captured with a Andor Zyla sCMOS camera (Andor Technology) fitted onto a Nikon Eclipse FN1 microscope (Nikon Instruments) equipped with a NIR Apo 40x 0.8 NA objective (Nikon Instruments). Data was acquired at  $256 \times 256$  pixels at a rate of 4 Hz using the NIS elements software (Nikon Instruments). To deliver odor stimulus, a Syntech CS-55 stimulus controller (Syntech) was used to switch a charcoal-filtered airstream ( $1 \text{ l min}^{-1}$ ) between a 4 mL vial (VWR) containing the solvent and a 4 mL vial containing the stimulus. In control experiment the air stream was switched between two vials. Analysis of fluorescence intensity dynamics was performed in Fiji [36, 37] using the measure stack function.

### Behavioral experiments

For the egg-laying assay, 15–20 newly mated females were introduced to two-choice Petri dishes. Two-choice dishes were made by dividing a 47 mm Petri dish (VWR) into two halves. One half as a treatment; odorant (150  $\mu\text{L}$  of a  $10^{-2}$  dilution) mixed with standard cornmeal fly food and the other half as control; fly food mixed with solvent. Experiments with fruit were performed in a similar manner. About 5g of ripe fruit, either marula or orange (chopped and briefly run through a kitchen blender), was mixed with fly food. Two-choice dishes were covered by a 6-oz fly stock bottle (VWR). After 24 hours, the number of eggs in each side was counted and an oviposition index (OI) calculated ( $\text{OI} = (\text{Number of eggs in treatment} - \text{Number eggs in control}) / \text{Total number of eggs}$ ). T-maze experiments were carried out in an assay constructed from two transparent plastic 4 mL screw-cap vials (VWR) connected by a T-shaped tubing connector (VWR). Stimulus, as well as solvent control was pipetted (10  $\mu\text{l}$ ) onto filter papers (0.5 cm x 0.5 cm, Grade: 1002, Munktel) and placed in respective chambers. 10 lightly cold anesthetized female flies were inserted into the assay through the T-connection. After allowing one minute for the flies to recover, the number of flies in respective chamber was recorded after three minutes. For the wind tunnel experiments, female flies (4–7 days old and mated) were starved 24 hours prior testing. Individual flies were released at the down-wind end of a wind tunnel (30x30x100 cm, made out of glass, and diffusely lit from above) [22] and exposed to a charcoal filtered air stream ( $0.15 \text{ m s}^{-1}$ ) carrying a plume of marula odor released upwind. For odor delivery, marula fruit was kept inside a 250 mL glass jar (VWR) with a 38 mm wide opening that was covered with a metal mesh (mesh size 2 mm). The side of the jar was covered with aluminum foil to prevent visual fruit signals stimulating the flies. Charcoal filtered air ( $0.5 \text{ l min}^{-1}$ ) was injected into the jar through a Pasteur pipette placed vertically above the mesh-covered opening. The air stream containing the fruit volatiles emanated as a wide plume from the opening of the jar into the center at the upwind end of the tunnel. Flies were recorded for upwind flight and landing at the odor source (i.e., on top of the metal mesh or the tip of the pipette) during 4 minutes.

### Population genetic analysis

Genetic variation at olfactory receptor genes was analyzed based on previously-sequenced, town-collected population samples [38] and newly-sequenced genomes from Kafue National Park [9]. Sub-Saharan population samples with at least 10 sequenced genomes were included, in addition to population samples from Egypt and France.  $F_{\text{ST}}$  [23, 24] between each pair of analyzed populations was calculated for all genomic windows on euchromatic chromosome arms, where windows were scaled by their genetic diversity content to contain 250 non-singleton SNPs in the Zambia-Siavonga population sample.  $F_{\text{ST}}$  was also evaluated for a similarly-defined window centered on the transcription start site of each olfactory receptor gene. For each population pair, an olfactory receptor gene's  $F_{\text{ST}}$  quantile was evaluated as the proportion of windows on the same chromosome arm for which this population pair showed a greater  $F_{\text{ST}}$  value than the focal gene's window. Circos [39] was then applied to visualize population pairs showing low  $F_{\text{ST}}$  quantiles



for each gene. Genomes carrying fusion (deletion) variants at the Or22 locus were readily detected based on a bimodal distribution of the number of sites with missing data within the known deletion region.

### QUANTIFICATION AND STATISTICAL ANALYSIS

Values are shown as violin plots; white circle show the median, box the 25th-75th percentiles, extended by whiskers indicating 1.5x the interquartile range from the 25th-75th percentiles; shape denotes density estimate and extend to extreme values, as stated for each graph in the figure legends. All statistics were performed using R (<https://cran.r-project.org/>). Statistical details related to sample size and p values are reported in the figure legends, with a star denoting  $p < 0.05$ .

Current Biology, Volume 28

**Supplemental Information**

**Wild African *Drosophila melanogaster***

**Are Seasonal Specialists on Marula Fruit**

**Suzan Mansourian, Anders Enjin, Erling V. Jirle, Vedika Ramesh, Guillermo Rehermann, Paul G. Becher, John E. Pool, and Marcus C. Stensmyr**

## The fly ur-host

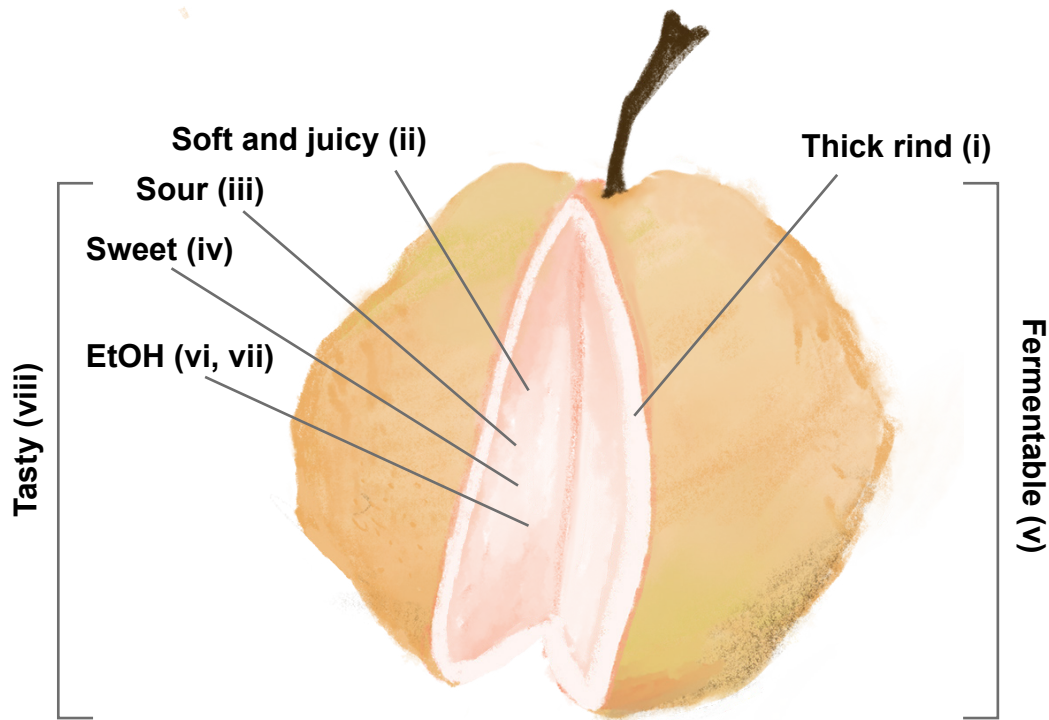

**Figure S1. Putative characteristics of the ancestral host. Relates to Figure 1.**

**i)** The citrus partiality indicates a fruit with thick rind [S1], **ii)** surrounding a soft and juicy pulp; allowing mobility of the larvae [S2]. **iii)** The fruit should be sour, since *D. melanogaster* preferentially lays eggs on acid-containing media [S3]. **iv)** The fruit should be sweet, given that *D. melanogaster* preferentially lays eggs on sugar rich substrates [S4]. **v)** The high sugar content would also ensure abundance of yeast – *D. melanogaster*'s favorite food [S5] – and enable rapid fermentation. **vi)** The fruit should have features that promote sustained high ethanol levels, under which *D. melanogaster* has a competitive advantage [S6]. **vii)** High ethanol levels also protect the larvae from parasitoid wasps [S7]. **viii)** The fruit should be palatable to humans, given that a shared human-fly preference would constitute the most direct route to commensalism. Drawing: Raket Stensmyr.

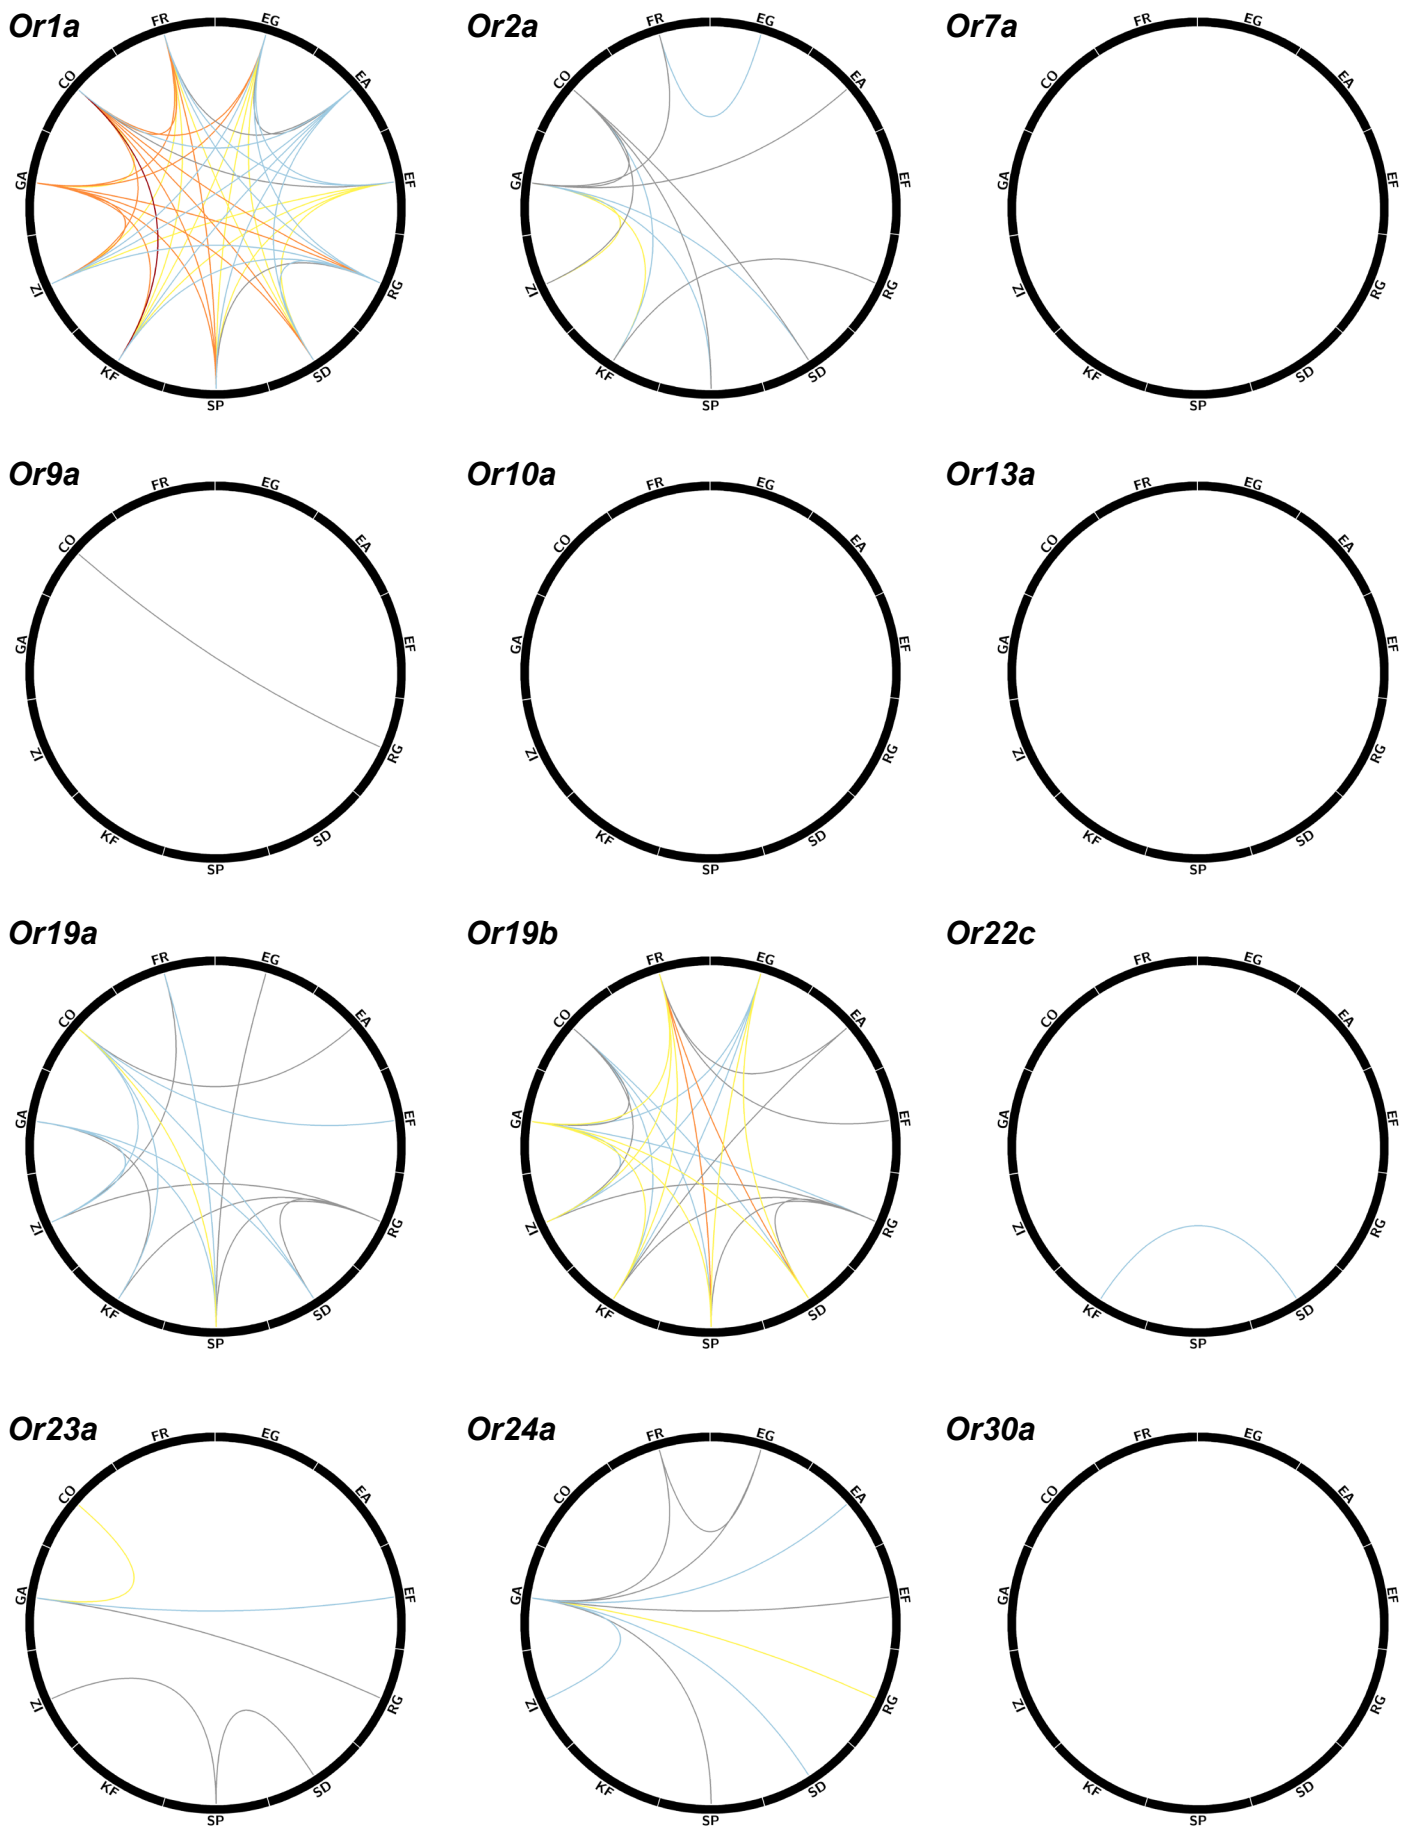

**Figure S2. Local genetic differentiation within the OR family. Relates to Figure 3.**

Circos plots based on  $F_{ST}$  quantiles for all drosophila odorant receptors. Only connections between populations with unusually high  $F_{ST}$  values (elevated genetic differentiation) are shown. Color code as in Figure 3O.



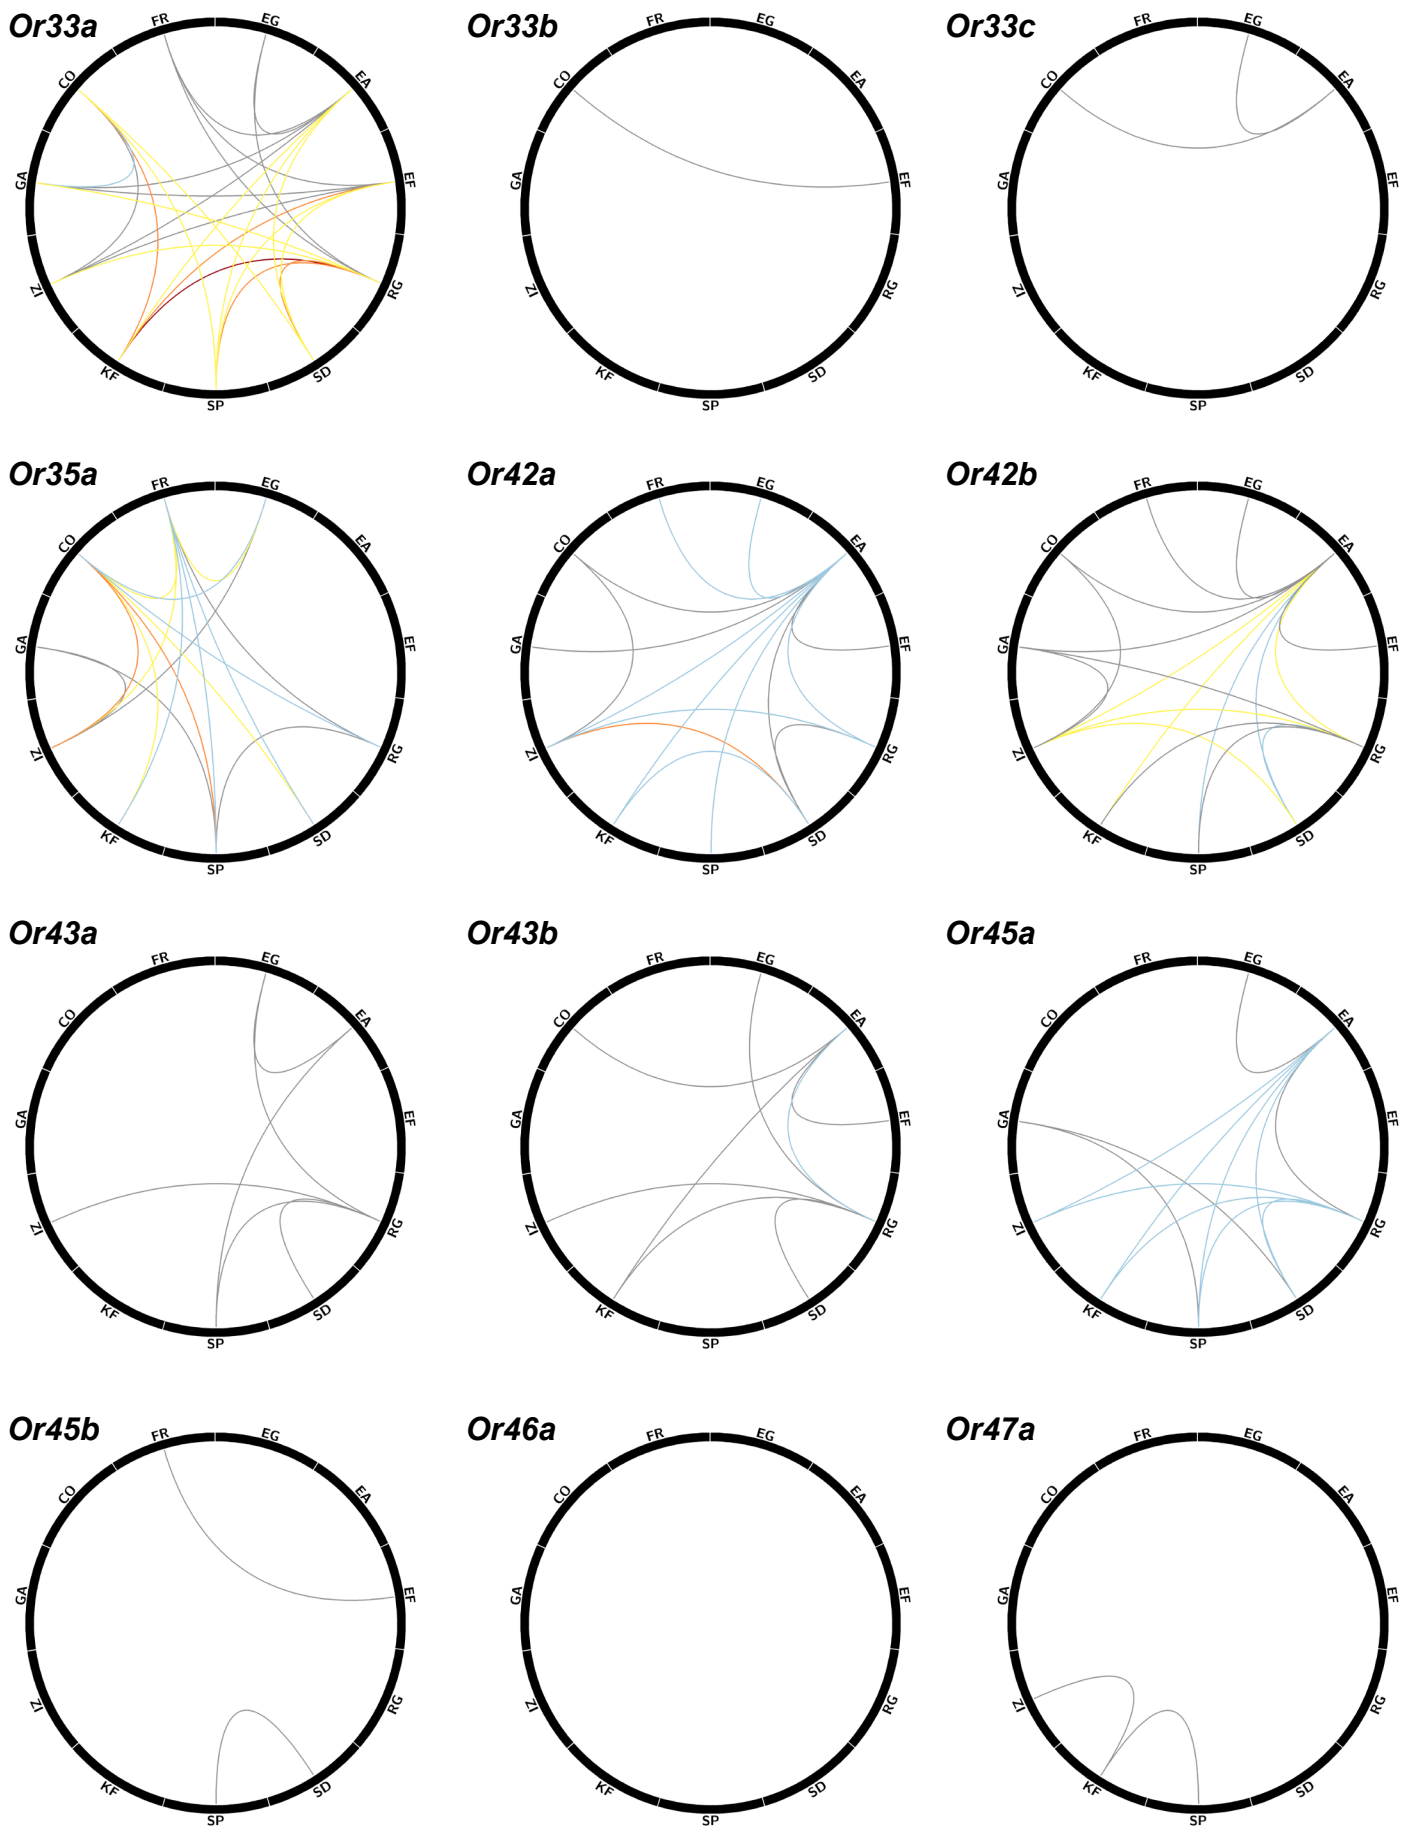

**Figure S2. Local genetic differentiation within the OR family. Relates to Figure 3.**  
Continued

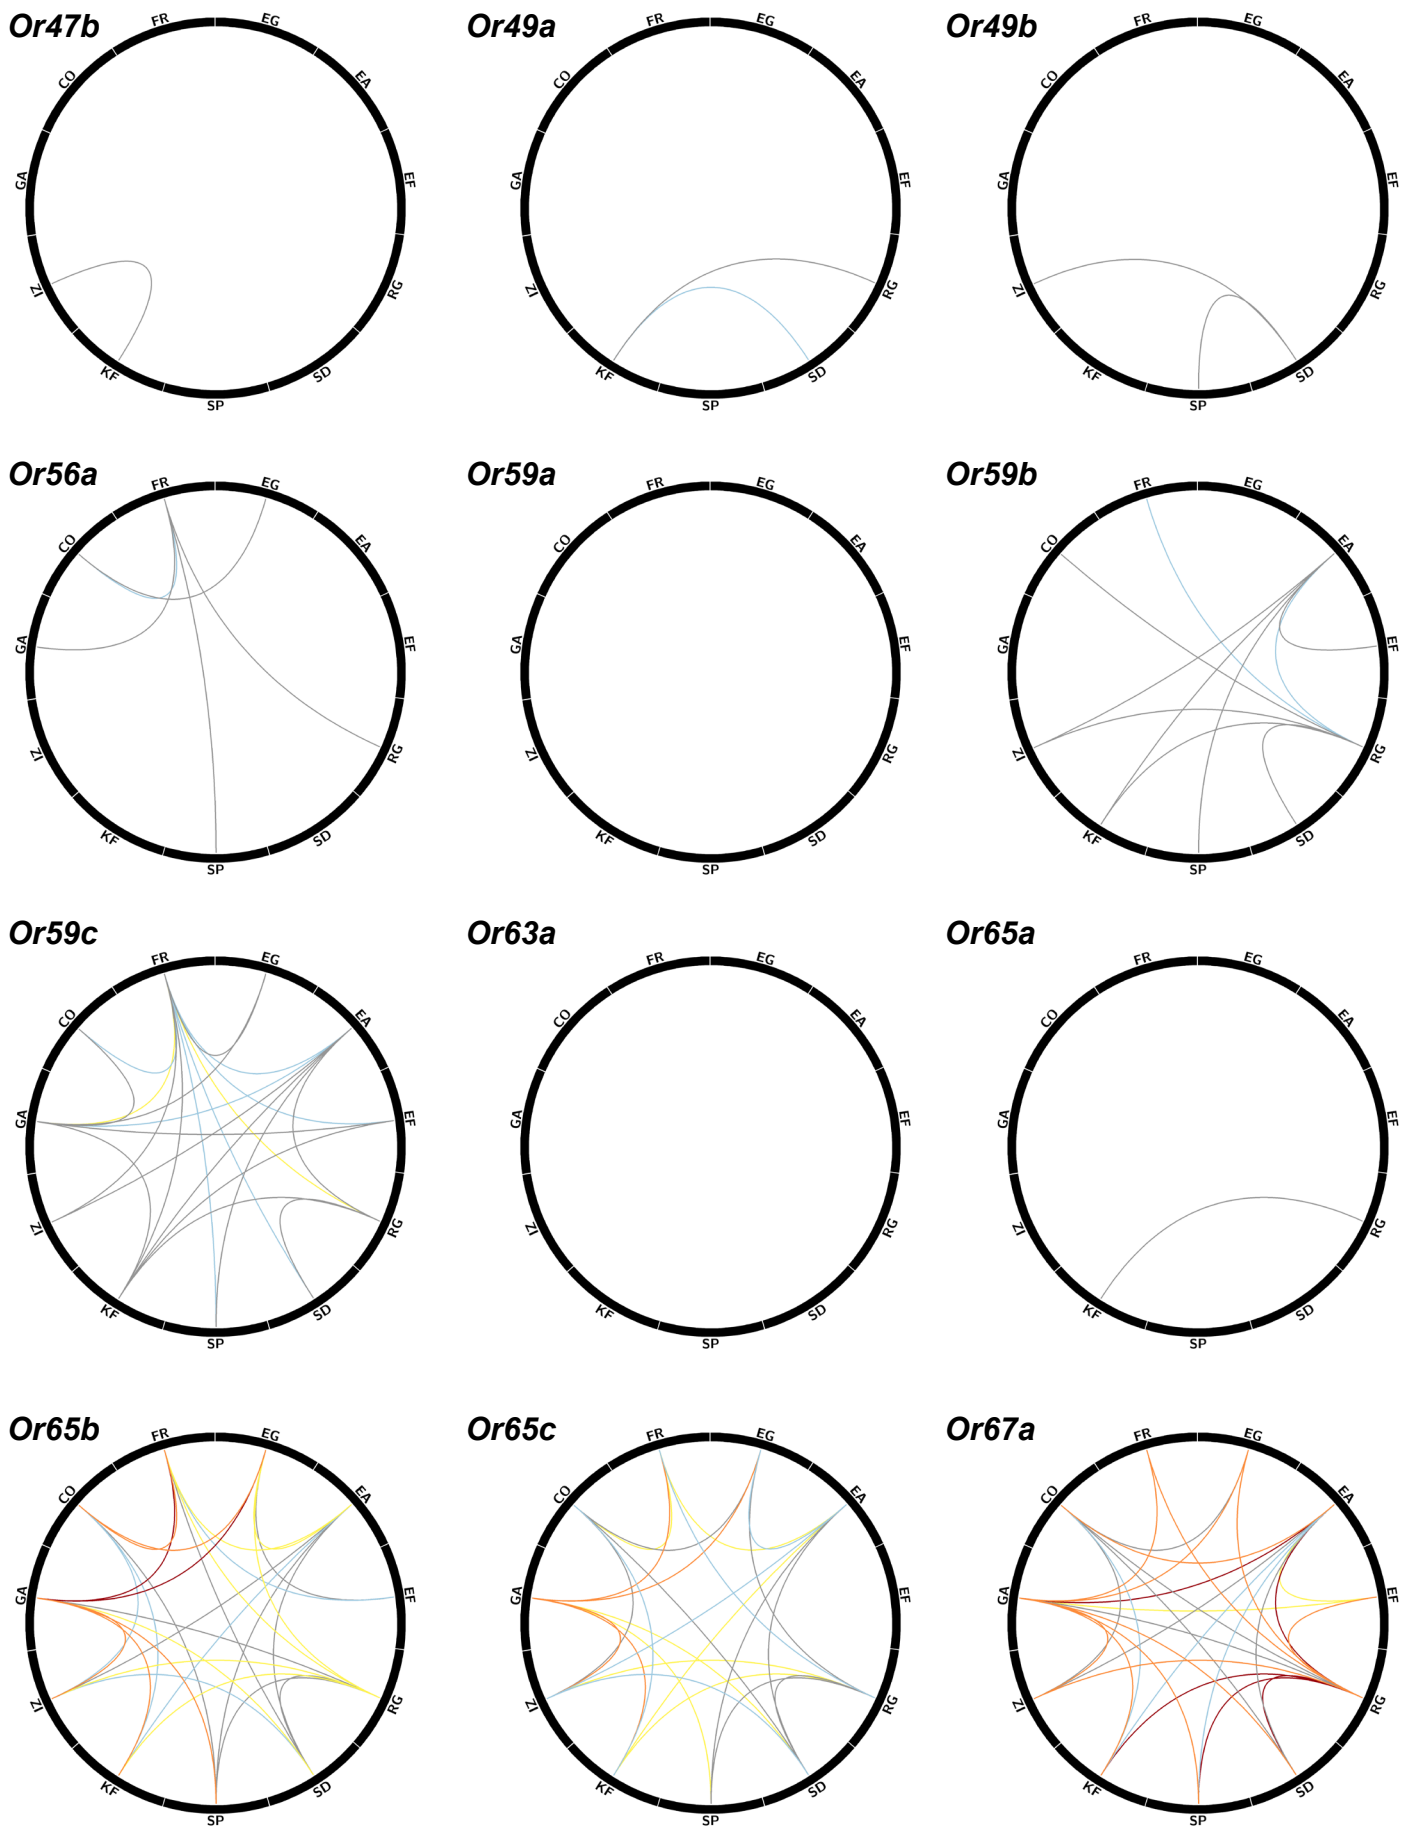

**Figure S2. Local genetic differentiation within the OR family. Relates to Figure 3.**  
Continued

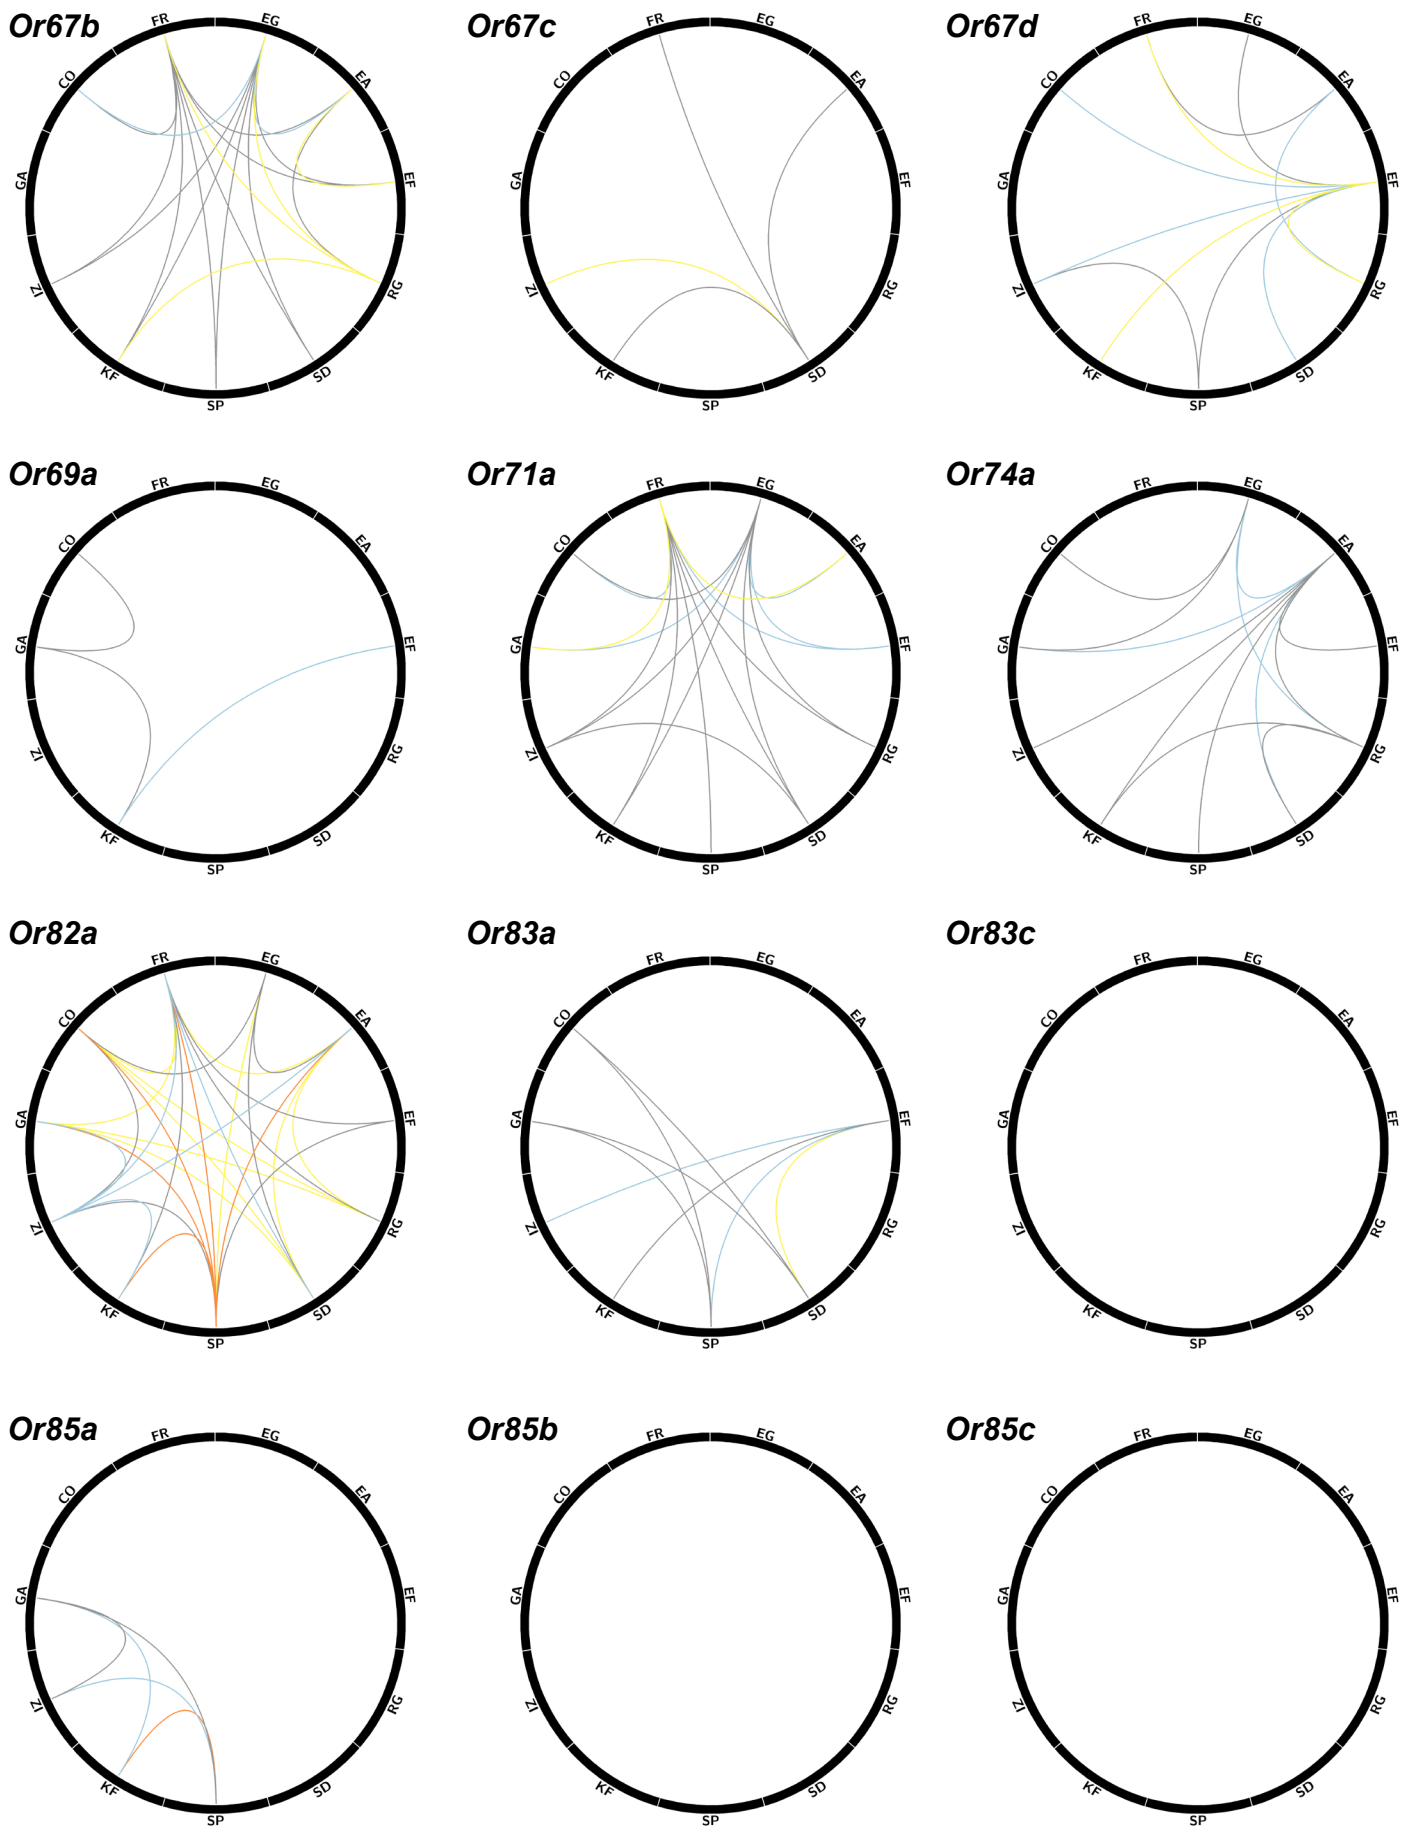

**Figure S2. Local genetic differentiation within the OR family. Relates to Figure 3.**  
Continued

**Or85d**

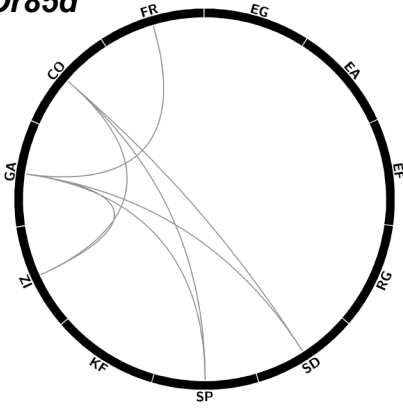

**Or85e**

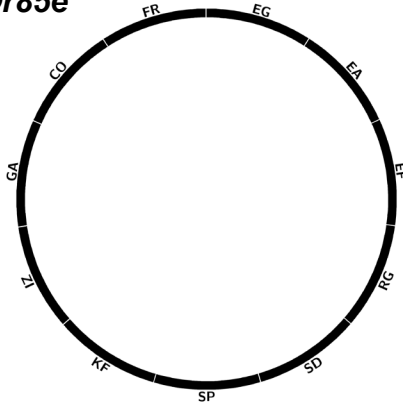

**Or85f**

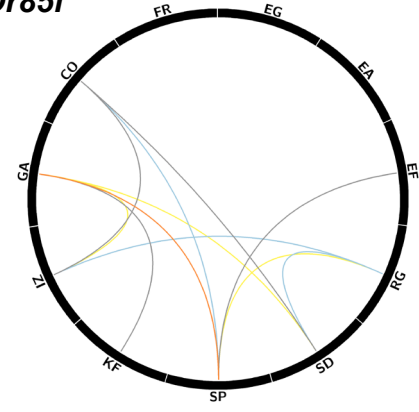

**Or88a**

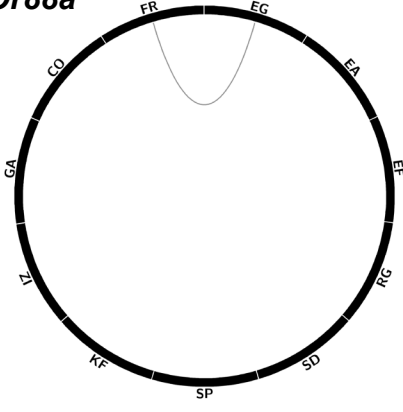

**Or92a**

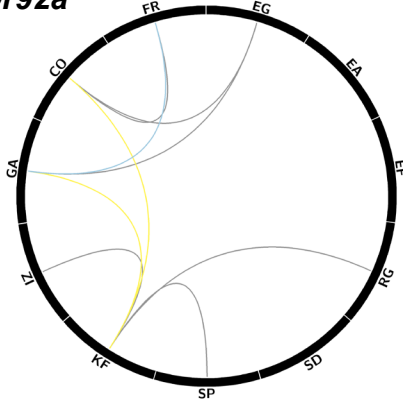

**Or94a**

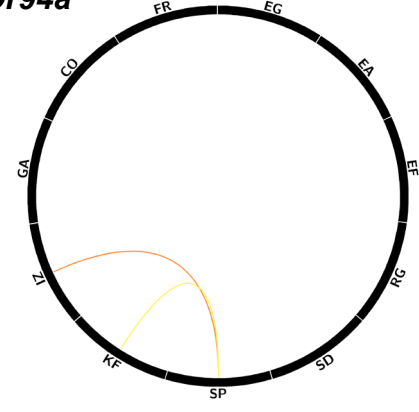

**Or94b**

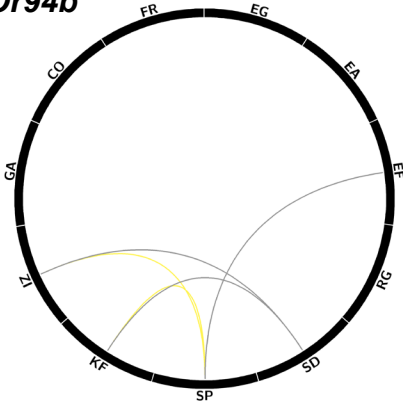

**Or98a**

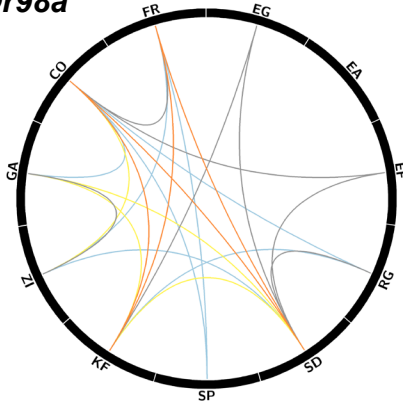

**Or98b**

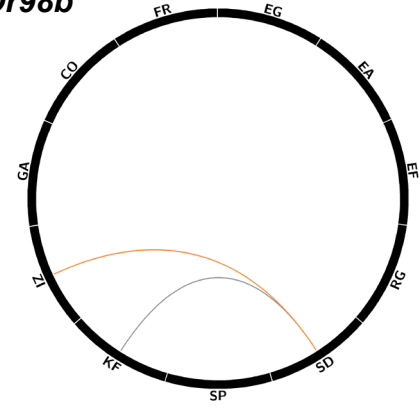

**Orco**

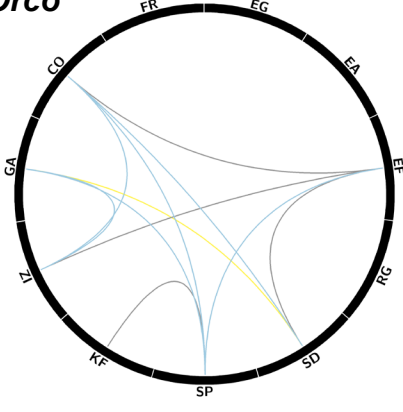

**Figure S2. Local genetic differentiation within the OR family. Relates to Figure 3.**  
Continued



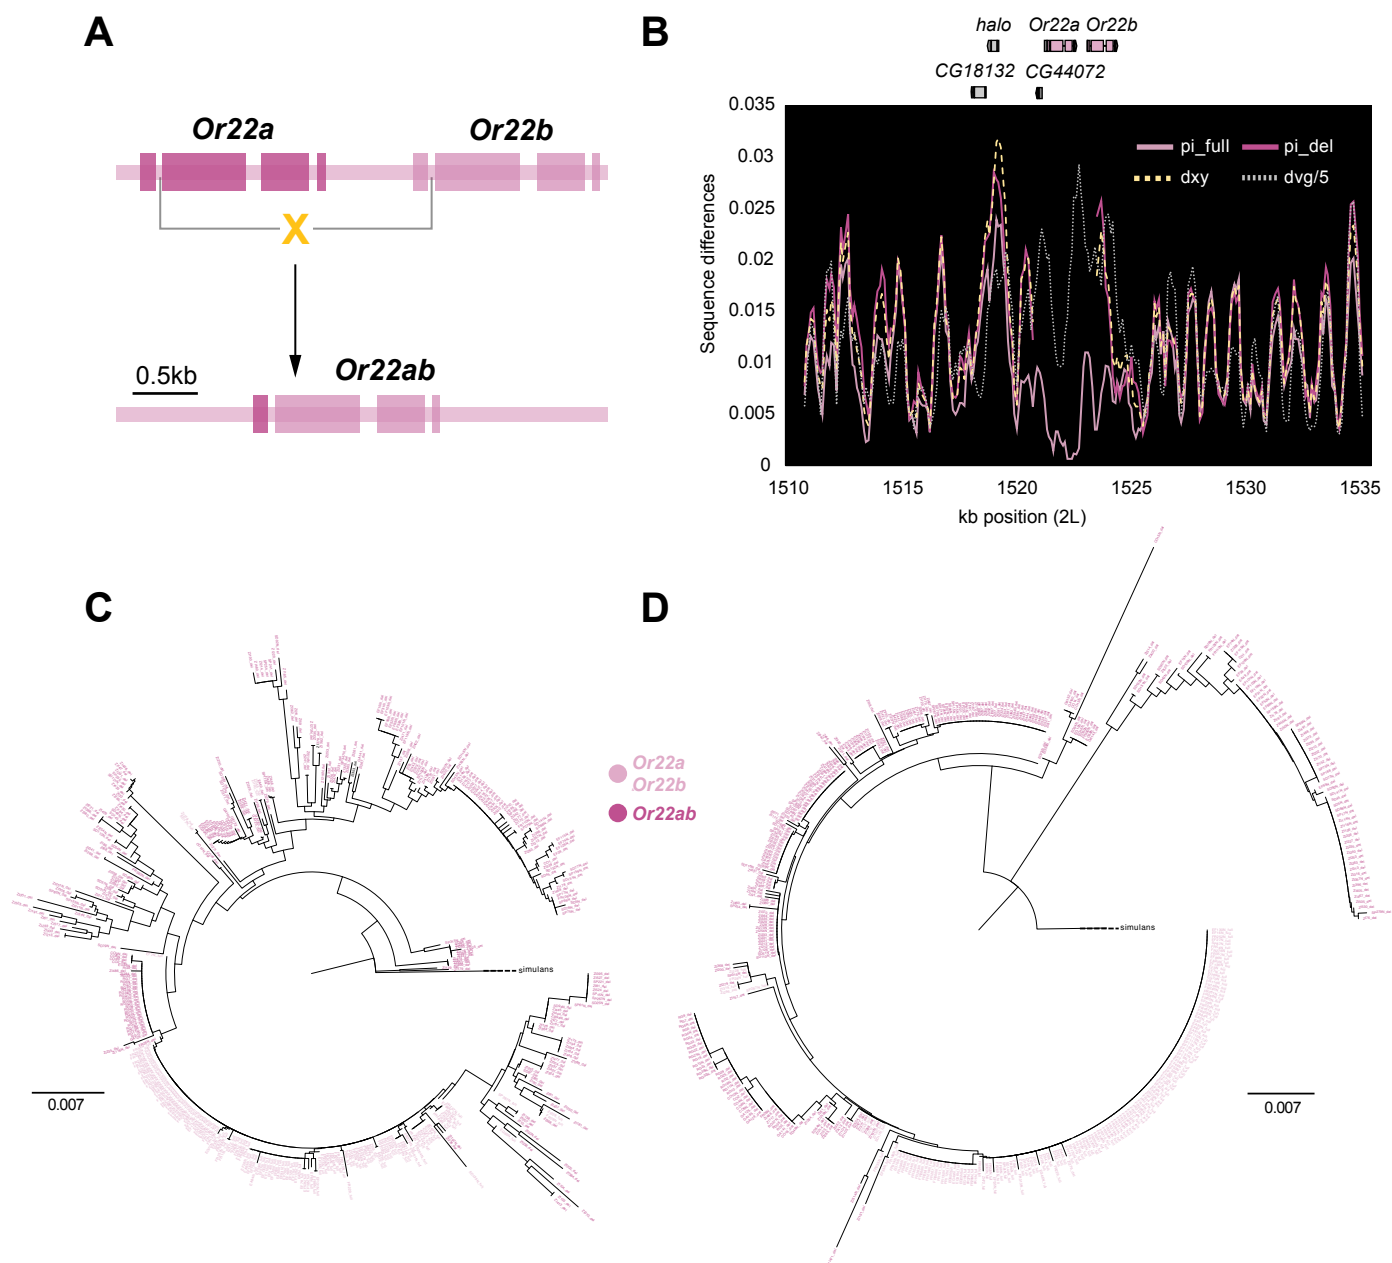

**Figure S3. Genetic variation at the *Or22* locus. Relates to Figure 3.**

(A) The *Or22a/Or22b* locus, with the chimeric *Or22ab* deletion variant below, in *D. melanogaster*.  
 (B) Rates of pairwise sequence differences: among Zambia genomes carrying the full *Or22a/Or22b* haplotype (pi\_full), among Zambia genomes carrying the deletion yielding the *Or22ab* fusion variant (pi\_del), between Zambia full and Zambia deletion alleles (dxy) and average sequence divergence between Zambia *D. melanogaster* and the *D. simulans* reference (divided by 5 to show on the same scale).  
 (C) A neighbor joining tree for a 500 bp section of the *Or22* region just upstream of the *Or22ab* deletion (1520.1 - 1520.6 kb), and (D) a comparable tree for a 500 bp region just downstream of this deletion (1522.9 - 1523.4 kb). Population labels are as in Figure 3O; “full” and “deletion” alleles are noted.

## Supplemental references

- S1.** Dweck, H.K.M., Ebrahim, S.A.M., Kromann, S., Bown, D., Hillbur, Y., Sachse, S., Hansson, B.S., and Stensmyr, M.C. (2013). Olfactory preference for egg laying on citrus substrates in *Drosophila*. *Curr. Biol.* 23, 2472–2480.
- S2.** Kim, D., Alvarez, M., Lechuga, L.M., and Louis, M. (2017). Species-specific modulation of food-search behavior by respiration and chemosensation in *Drosophila* larvae. *eLife*, 6, e27057
- S3.** Chen, Y., and Amrein, H. (2017). Ionotropic receptors mediate *Drosophila* oviposition preference through sour gustatory receptor neurons. *Curr. Biol.* 27, 2741-2750.
- S4.** Schwartz, N.U., Zhong, L., Bellemer, A., and Tracey, W. D. (2012). Egg laying decisions in *Drosophila* are consistent with foraging costs of larval progeny. *PloS one*, 7, e37910.
- S5.** Baumberger, J.P. (1917). The Food of *Drosophila melanogaster* Meigen. *Proc. Natl. Acad. Sci. USA* 3, 122–126.
- S6.** McKenzie, J. A., & Parsons, P. A. (1972). Alcohol tolerance: an ecological parameter in the relative success of *Drosophila melanogaster* and *Drosophila simulans*. *Oecologia*, 10, 373-388.
- S7.** Lynch, Z.R., Schlenke, T.A., Morran, L.T., and De Roode, J.C. (2017). Ethanol confers differential protection against generalist and specialist parasitoids of *Drosophila melanogaster*. *PloS one*, 12, e0180182.
